# Supplementary material
Source: Research Square preprint supplement (doi:10.21203/rs.3.rs-9549778/v1)
Supplement: Supplementary file 1 [file b166b0a01fcf5bae7df9c83c.docx]

**Supplementary Materials**

Contents

[Supplementary Notes 2](#_Toc225848257)

[**Supplementary Note 1: Monomer data processing pipeline** 2](#_Toc225848258)

[**Supplementary Note 2: Complex data processing pipeline** 2](#_Toc225848259)

[**Supplementary Note 3: Antibody-antigen dataset processing pipeline** 3](#_Toc225848260)

[**Supplementary Note 4: Task** 3](#_Toc225848261)

[Supplementary Tables 7](#_Toc225848262)

[Supplementary Figures 25](#_Toc225848263)

# **Supplementary Notes**

## **Supplementary Note 1: Monomer data processing pipeline**

To construct a protein monomer dataset for model pre-training, we downloaded all available structures (mmCIF format) as of February 1st, 2025, from the RCSB Protein Data Bank (PDB). For NMR ensembles, only the first model for structures containing multiple models was retained. For protein complex assemblies, each single-chain protein was extracted from the structure files. Subsequently, the resulting single chains were processed through the following filtering pipeline:

1. Structures with a resolution > 5 Å were removed, while NMR structures were retained.
2. Remove data rows containing annotations such as HETATM, ANISOU, and altLoc.
3. All non-protein molecules, including crystallization additives, ions, small molecules, glycans, DNA, and RNA, were removed.
4. All hydrogen atoms were removed.
5. All non-standard amino acids were labeled as UNK from the structures. Chains containing > 50% unknown residues and non-standard amino acids (UNK) were discarded.
6. If less than 50% of the chain contains complete residues (defined as containing the main chain heavy atoms N, CA, and C), or if the total number of complete residues is less than 50, the chain is discarded.
7. Atoms with an occupancy rate less than 0.5 are removed. Any chain with more than 50% missing atoms is discarded.
8. Protein chains with residue length between 50 and 900 AA were retained.
9. Residue indexes were renumbered (1-indexed) based on the reference sequence, and residues with insertion codes were numbered sequentially.
10. The filtered single-chain sequences were clustered at 70% sequence identity using MMseqs2 (v17-b804f).

## **Supplementary Note 2: Complex data processing pipeline**

To construct the protein dimer dataset for model pre-training, we specifically filtered PDB entries containing exactly two chains within a single structure model. To ensure data quality, these dimer complexes were processed with the following pipeline:

1-8. Consistent with the description in Supplementary Note 1 (step 1 - step 8)

1. Each protein chain with a residue length between 20 and 650 AA was retained.
2. Structures recorded in the SAbDab database were removed.
3. We applied an interface-based clustering approach similar to AlphaFold3. First, MMseqs2 (v17-b804f) was used to perform 100% sequence identity clustering on each chain in the dimer. Then, the cluster IDs of the two chains were paired to form the interface IDs of the complex, and clustered according to 70% similarity to form the final clusters of the complexes.

## **Supplementary Note 3: Antibody-antigen dataset processing pipeline**

To construct the antibody-antigen dataset for model pre-training, we retrieved entry identifiers from the SAbDab database ( as of May 16, 2025) and downloaded the corresponding structures from the RCSB PDB. These data were processed through the following pipeline:

1. Entries lacking a heavy chain or missing any SAbDab-specified chain in the corresponding PDB structure were removed.
2. Structures with a resolution > 3.5 Å were removed. All NMR structures were retained.

3-8. Each chain went through in Supplementary Note 1 (steps 3-7, step 9)

1. For a multi-chain structure, if any chain was discarded in the above steps, the whole structure was removed.
2. Antibody-antigen structures with a total sequence length > 1250 AA were discarded.
3. For the structure containing more than two antigen chains or exhibiting chain identifier conflicts between the antibody and antigen, only the antibody structure was retained.
4. For structures containing only a single antibody chain (e.g., scFv or VHH), sequences were clustered at 70% identity using MMseqs2 (v17-b804f). For antibody-antigen and monoclonal antibody structures, we applied the interface-based clustering approach described in Supplementary Note 2 (step 11).

## **Supplementary Note 4: Task**

**Comparison the sequence and structural diversity of monomers and complexes.** To verify whether complexes contain richer sequence and structural information than monomers, we conducted two evaluations. First, to compare the sequence diversity of monomers and complexes, we used MMseqs2 (v17-b804f) to cluster the data (including 613,872 monomers and 62,044 complexes) with a 70% sequence identity threshold, and then calculated the reduction in dataset size after clustering. Second, to assess the structural diversity between monomers and complexes, we adopted the theoretical framework to calculate the normalized Rg of the data before clustering. Specifically, for each representative structure, all protein atoms from all constituent chains were extracted and their center of mass were determined. Rg was then calculated as the mass-weighted root mean square distance from these selected atoms to their center of mass. To ensure comparability across proteins of different sizes, the Rg values were normalized by , where represents the total number of selected atoms. Finally, to compare the structural diversity of monomers and complexes, we generated histogram of the probability density distributions of normalized Rg values and their corresponding boxplot to analyze the result.

**Impact of complexes on monomer generative model.** To evaluate the contributions of monomers and complexes to the prediction of monomer ensembles, we pre-trained Model C, Model M, and Model A as mentioned in Methods. To evaluate these models, we selected 30 general targets from the independent monomer test data as a test set (Supplementary Table 1). For each test protein, 1,000 frames were sampled using Model C, Model M, and Model A, respectively. Additionally, we extracted 10,001 frames from the corresponding 100 ns MD trajectories of each test protein as reference ensembles for subsequent evaluation. Before computing the metrics, we performed global sequence alignment using the BLASTp to extract the shared residues between the predicted and the reference MD. We excluded non-standard residues and redundant atoms. The obtained trajectories were then filtered to retain only atoms. Finally, to eliminate global translational and rotational motions, we aligned the predicted ensembles to the reference MD based on the coordinates. To compare the global conformational features of the predicted ensembles with those generated from MD simulations. Following these preprocessing steps, we calculated the PwD-JSD, Rg-JSD, and rRMSF metrics to evaluate the consistency of global features between the predicted and reference MD ensembles. Furthermore, to assess the conformational coverage of the predicted ensemble to the reference MD ensemble, we extracted and applied periodic boundary corrections to the backbone dihedral angles from the aligned trajectories. After standardizing the data, we solely fitted a time-lagged independent component analysis (TICA) model on the reference MD data. Following the ConfDiff approach, we mapped the data to slow processes across multiple lag times to find the coordinates of maximal autocorrelation. Finally, we projected the predicted conformations onto the TICA space defined by the MD data and quantified the distributions by calculating the RMWD and TIC-JSD.

**MD fine-tuning data volume analysis.** To evaluate the impact of MD fine-tuning data volume on model performance, we first partitioned the MD trajectories into a training and a validation set based on PDB release dates. In the In-house database, the training set included antigen-antibody complexes and dimers released before January 23, 2021, with a resolution < 3.5 Å; the validation set included structures released between January 24, 2024, and May 7, 2025, with a resolution < 3.0 Å (Supplementary Table 2). Using the MD fine-tuning strategy mentioned in Methods, we randomly selected subsets of 1,000, 2,000, and 3,000 trajectories from the training set. We then fine-tuned model C on these subsets and the full dataset (5,502 trajectories) to obtain the corresponding models: Model 1k, Model 2k, Model 3k, and DynoM. Subsequently, we used the same 30 protein test set and pipeline mentioned above to calculate PwD-JSD, Rg-JSD, rRMSF, TIC-JSD and TIC-RMWD metrics to evaluate these models. Finally, to specifically show the performance variations of different models on identical proteins, the two-dimensional TICA projections of five proteins (PDB ID: 9FJ1, 9DZS,9JVM, 9JDS and 9GV5) were selected and plotted as scatter plots for visualization.

**Comparison with other methods.** To comprehensively evaluate the capabilities of DynoM, we compared it with three state-of-the-art models for protein conformational sampling: AlphaFlow (-MD-base), BioEmu (v1.1), and ConfDiff (-OF-r3-MD). Because existing methods primarily focus on shorter monomeric protein domains, we added 33 proteins, including 21 with sequence lengths exceeding 500 residues, to our previously established 30-protein test set. By incorporating these larger proteins, we evaluated the models' generalization capabilities on long sequences, as well as their ability to capture long-range interactions in large-scale proteins. All baseline models are run on their default settings. we sampled 1,000 frames from each model for evaluation. We also extracted 10,001 frames from the 100 ns all-atom MD simulation trajectories of these 63 proteins as reference structures. Subsequently, we calculated evaluated the Rg-JSD, PwD-JSD, rRMSF, TIC-JSD and TIC-RMWD metrics.Furthermore, to investigate the models' capacity to capture long-range interactions, we calculated the average spatial distance deviations across all Cα atom pairs between the predicted ensembles and the reference MD. These pairwise distance deviations were then arranged into a symmetric matrix and mapped onto a two-dimensional heatmap, visualizing the inter-domain distance deviations of the predicted conformations relative to the MD references. Additionally, we selected specific key sites within the spanning structural domains and plotted histograms of the PwD distributions for both the predicted and reference MD to display the structural deviations in these specific inter-domain regions.

**Sampling conformational changes.** To evaluate the model's capacity to capture multi-conformational proteins, we selected eleven representative multi-state proteins from the BioEMU and PathPre datasets. For two of the proteins from the BioEMU dataset, we randomly selected 10 frames each from both the 1,000-frame generated ensemble and the reference MD trajectory. These structures were visualized using PyMOL to demonstrate the structural similarity between the predicted and the reference MD ensembles. Subsequently, we employed PCA to map the distinct conformational states onto a two-dimensional space. By calculating the Gaussian kernel density of this 2D projection and applying the inverse Boltzmann relation, we converted the normalized densities into pseudo-energy values and constructed an energy landscape to determine whether the predicted conformations adequately covered the multi-state distribution obtained from the MD simulations. Finally, we utilized the Define Secondary Structure of Proteins (DSSP) algorithm to calculate the distribution of secondary structure content. This step verified the model's ability to accurately capture secondary structural transitions within specific dynamic regions while maintaining the stability of relatively rigid regions. For the nine multi-conformational proteins sourced from the PathPre dataset, we used their two dominant RCSB experimental structures as references. We computed the RMSD between the predicted and reference MD structures, and plotted RMSD-based free energy landscapes to display whether the model successfully captured the correct multi-conformations(Figure 4, Supplementary Fig. 7-10).

**Performance of DynoM in Capturing Dynamic Conformations**. To evaluate DynoM's ability to capture the dynamic conformations of protein complexes, we compared it against AlphaFold3 (AF3). To prevent data leakage, we constructed an independent test set by randomly selecting 20 antigen-antibody complexes from the PDB (as of July 21, 2024). For each complex, 100 structures were generated using both methods. AF3 predictions were obtained via the DeepMind AlphaFold Server with default settings. First, we renumbered the antibodies according to the Chothia loop definitions using ANARCI. We then calculated the RMSD of the complementarity-determining regions (CDRs H1–H3, L1–L3) and the framework regions using PyRosetta4. Furthermore, the antibody heavy and light chains were treated as a single unit for docking against the antigen. The DockQ program (<https://github.com/wallnerlab/DockQ>) was employed to compare predicted structures with the reference structures, and calculate interface RMSD (iRMSD) and DockQ scores. Predicted structures with a DockQ score > 0.23 were classified as acceptable models. Finally, we analyzed the distributions of TM-scores and iRMSD to assess whether the conformational space sampled by the models successfully covered the MD ensembles.

# **Supplementary Tables**

**Supplementary Table 1:** Thirty independent test proteins used in Figure 2

See the Supplementary_table_1.csv

**Supplementary Table 2:** In-house protein complex dataset used for MD simulations.

See the Supplementary_table_2.csv

**Supplementary Table 3:** The PwD-JSD metrics between the generated conformational distribution and the reference MD distribution for seven methods on each of the 30 independent test proteins. The best result for each protein was highlighted in bold.

| PDB ID | Model_M | Model_C | Model_A | Model_1K | Model_2K | Model_3k | DynoM |
| --- | --- | --- | --- | --- | --- | --- | --- |
| 8XCL | 0.3689 | 0.4125 | 0.3185 | 0.2729 | 0.2704 | 0.2667 | 0.2843 |
| 8XHY | 0.395 | 0.4377 | 0.3559 | 0.3078 | 0.3073 | 0.306 | 0.3027 |
| 8Y4Y | 0.439 | 0.4808 | 0.3849 | 0.306 | 0.3026 | 0.3043 | 0.2901 |
| 8YT7 | 0.3976 | 0.4414 | 0.3671 | 0.3354 | 0.3328 | 0.3299 | 0.3191 |
| 8Z13 | 0.3894 | 0.3945 | 0.3361 | 0.3112 | 0.3132 | 0.3112 | 0.3168 |
| 8Z3H | 0.4212 | 0.4552 | 0.3636 | 0.2819 | 0.2776 | 0.2789 | 0.2817 |
| 8Z3I | 0.3267 | 0.3658 | 0.3252 | 0.3114 | 0.3176 | 0.314 | 0.3115 |
| 8ZGZ | 0.4694 | 0.4768 | 0.4468 | 0.419 | 0.4068 | 0.4126 | 0.42 |
| 8ZIC | 0.3971 | 0.4106 | 0.3458 | 0.3124 | 0.3108 | 0.3138 | 0.3148 |
| 8ZKE | 0.4616 | 0.4842 | 0.4508 | 0.4072 | 0.3956 | 0.3978 | 0.3968 |
| 8ZVA | 0.4727 | 0.527 | 0.4273 | 0.37 | 0.3678 | 0.3634 | 0.356 |
| 9B86 | 0.3938 | 0.4223 | 0.3432 | 0.2879 | 0.2797 | 0.277 | 0.2786 |
| 9BOJ | 0.4045 | 0.3951 | 0.4008 | 0.3741 | 0.3746 | 0.3747 | 0.3828 |
| 9C0A | 0.4784 | 0.5172 | 0.4319 | 0.3789 | 0.3738 | 0.3743 | 0.3591 |
| 9CG2 | 0.369 | 0.4036 | 0.3627 | 0.3204 | 0.3206 | 0.3164 | 0.3275 |
| 9DDL | 0.6547 | 0.6612 | 0.6237 | 0.5928 | 0.5862 | 0.5918 | 0.5723 |
| 9DZS | 0.346 | 0.3906 | 0.3427 | 0.3242 | 0.3304 | 0.3296 | 0.3485 |
| 9EMO | 0.4143 | 0.4409 | 0.3882 | 0.3402 | 0.3296 | 0.3294 | 0.3208 |
| 9FJ1 | 0.4149 | 0.4631 | 0.3774 | 0.3454 | 0.3383 | 0.3407 | 0.3321 |
| 9GRZ | 0.5473 | 0.5493 | 0.5385 | 0.4979 | 0.5023 | 0.5023 | 0.5025 |
| 9GV5 | 0.4397 | 0.436 | 0.4169 | 0.4048 | 0.4064 | 0.4088 | 0.4203 |
| 9H92 | 0.4383 | 0.4979 | 0.3819 | 0.294 | 0.2856 | 0.2864 | 0.2955 |
| 9HHQ | 0.4584 | 0.4637 | 0.4487 | 0.4401 | 0.4421 | 0.4443 | 0.4468 |
| 9HTU | 0.4864 | 0.5318 | 0.4176 | 0.3363 | 0.3276 | 0.334 | 0.3324 |
| 9J7V | 0.4385 | 0.4804 | 0.3993 | 0.3417 | 0.3306 | 0.3335 | 0.3165 |
| 9JDS | 0.4494 | 0.4778 | 0.4348 | 0.3845 | 0.3782 | 0.3831 | 0.3865 |
| 9JJU | 0.428 | 0.4191 | 0.4159 | 0.3985 | 0.3932 | 0.3901 | 0.3902 |
| 9JVM | 0.5614 | 0.5718 | 0.5241 | 0.5023 | 0.4968 | 0.5009 | 0.4998 |
| 9MRB | 0.3491 | 0.4045 | 0.3781 | 0.3185 | 0.3133 | 0.315 | 0.3158 |
| 9NOY | 0.3947 | 0.4173 | 0.3938 | 0.3666 | 0.3618 | 0.3642 | 0.3639 |
| Median | 0.4246 | 0.4483 | 0.391 | 0.34095 | 0.3317 | 0.33375 | 0.33225 |

**Supplementary Table 4:** The Rg-JSD metrics between the generated conformational distribution and the reference MD distribution for seven methods on each of the 30 independent test proteins. The best result for each protein was highlighted in bold.

| PDB ID | Model_M | Model_C | Model_A | Model_1K | Model_2K | Model_3k | DynoM |
| --- | --- | --- | --- | --- | --- | --- | --- |
| 8XCL | 0.3042 | 0.3794 | 0.1276 | 0.2176 | 0.1919 | 0.1367 | 0.159 |
| 8XHY | 0.5518 | 0.7422 | 0.3394 | 0.3594 | 0.3043 | 0.3559 | 0.1982 |
| 8Y4Y | 0.6875 | 0.7498 | 0.4079 | 0.3814 | 0.3811 | 0.4062 | 0.3038 |
| 8YT7 | 0.5994 | 0.704 | 0.432 | 0.3629 | 0.2985 | 0.3325 | 0.2697 |
| 8Z13 | 0.2263 | 0.3158 | 0.2188 | 0.2292 | 0.2727 | 0.2327 | 0.3147 |
| 8Z3H | 0.6855 | 0.7536 | 0.1412 | 0.3056 | 0.297 | 0.3462 | 0.1454 |
| 8Z3I | 0.4604 | 0.5816 | 0.332 | 0.3649 | 0.4631 | 0.3968 | 0.3217 |
| 8ZGZ | 0.4028 | 0.4422 | 0.3892 | 0.3884 | 0.3586 | 0.3345 | 0.376 |
| 8ZIC | 0.3646 | 0.5384 | 0.2408 | 0.2542 | 0.2907 | 0.2588 | 0.3518 |
| 8ZKE | 0.6919 | 0.7071 | 0.6484 | 0.675 | 0.5606 | 0.6237 | 0.6489 |
| 8ZVA | 0.6953 | 0.3062 | 0.7759 | 0.7506 | 0.7655 | 0.7567 | 0.7411 |
| 9B86 | 0.4889 | 0.6603 | 0.3333 | 0.2453 | 0.2042 | 0.2665 | 0.2466 |
| 9BOJ | 0.6704 | 0.5152 | 0.4957 | 0.4986 | 0.4443 | 0.468 | 0.5164 |
| 9C0A | 0.5326 | 0.6594 | 0.3339 | 0.4273 | 0.4089 | 0.4356 | 0.2827 |
| 9CG2 | 0.4799 | 0.4661 | 0.3496 | 0.3205 | 0.3173 | 0.3099 | 0.3689 |
| 9DDL | 0.832 | 0.3424 | 0.8195 | 0.832 | 0.8148 | 0.8199 | 0.8085 |
| 9DZS | 0.3178 | 0.2566 | 0.4022 | 0.4184 | 0.5001 | 0.5177 | 0.5968 |
| 9EMO | 0.5989 | 0.7039 | 0.4482 | 0.5796 | 0.4946 | 0.5276 | 0.2601 |
| 9FJ1 | 0.786 | 0.8272 | 0.619 | 0.5371 | 0.552 | 0.5904 | 0.4634 |
| 9GRZ | 0.2873 | 0.2578 | 0.3758 | 0.2624 | 0.3563 | 0.3165 | 0.3615 |
| 9GV5 | 0.5921 | 0.3978 | 0.4159 | 0.4718 | 0.5354 | 0.5433 | 0.5887 |
| 9H92 | 0.795 | 0.8303 | 0.7215 | 0.5623 | 0.4647 | 0.4904 | 0.3142 |
| 9HHQ | 0.4461 | 0.3964 | 0.4293 | 0.4322 | 0.4301 | 0.4262 | 0.4391 |
| 9HTU | 0.2655 | 0.4404 | 0.4025 | 0.3233 | 0.3419 | 0.3079 | 0.3339 |
| 9J7V | 0.7609 | 0.8141 | 0.5947 | 0.6493 | 0.5795 | 0.6241 | 0.4579 |
| 9JDS | 0.6905 | 0.8212 | 0.6047 | 0.5668 | 0.4601 | 0.5067 | 0.5455 |
| 9JJU | 0.5987 | 0.5177 | 0.2879 | 0.4858 | 0.4301 | 0.4187 | 0.3634 |
| 9JVM | 0.4947 | 0.6599 | 0.4563 | 0.4617 | 0.3632 | 0.4293 | 0.2526 |
| 9MRB | 0.5844 | 0.7516 | 0.1598 | 0.46 | 0.4405 | 0.5252 | 0.4294 |
| 9NOY | 0.4831 | 0.1422 | 0.3272 | 0.2994 | 0.3188 | 0.2957 | 0.2756 |
| Median | 0.5681 | 0.56 | 0.40235 | 0.42285 | 0.4195 | 0.42245 | 0.35665 |

**Supplementary Table 5:**The rRMSF metrics between the generated conformational distribution and the reference MD distribution for seven methods on each of the 30 independent test proteins. The best result for each protein was highlighted in bold.

| PDB ID | Model_M | Model_C | Model_A | Model_1K | Model_2K | Model_3k | DynoM |
| --- | --- | --- | --- | --- | --- | --- | --- |
| 8XCL | 0.8843 | 0.894 | 0.8887 | 0.926 | 0.9127 | 0.9226 | 0.9126 |
| 8XHY | 0.8267 | 0.8393 | 0.8173 | 0.8515 | 0.8646 | 0.8619 | 0.8659 |
| 8Y4Y | 0.7079 | 0.6659 | 0.6463 | 0.6173 | 0.6167 | 0.6214 | 0.6106 |
| 8YT7 | 0.8122 | 0.8136 | 0.7968 | 0.8207 | 0.8065 | 0.7907 | 0.7961 |
| 8Z13 | 0.8236 | 0.8365 | 0.8196 | 0.798 | 0.8148 | 0.8085 | 0.7967 |
| 8Z3H | 0.8573 | 0.8647 | 0.8814 | 0.8496 | 0.8912 | 0.8717 | 0.8887 |
| 8Z3I | 0.9475 | 0.9519 | 0.9373 | 0.9395 | 0.933 | 0.9584 | 0.9163 |
| 8ZGZ | 0.9584 | 0.9347 | 0.9445 | 0.9415 | 0.9575 | 0.9386 | 0.9507 |
| 8ZIC | 0.7613 | 0.777 | 0.6994 | 0.8025 | 0.8194 | 0.8235 | 0.765 |
| 8ZKE | 0.7243 | 0.7705 | 0.7798 | 0.7738 | 0.7616 | 0.7408 | 0.8425 |
| 8ZVA | 0.9172 | 0.6313 | 0.7551 | 0.8083 | 0.809 | 0.7797 | 0.7318 |
| 9B86 | 0.9042 | 0.9312 | 0.8808 | 0.8567 | 0.8586 | 0.8575 | 0.8424 |
| 9BOJ | 0.8932 | 0.864 | 0.8862 | 0.87 | 0.8361 | 0.8201 | 0.8049 |
| 9C0A | 0.696 | 0.6996 | 0.669 | 0.7224 | 0.7317 | 0.7284 | 0.7379 |
| 9CG2 | 0.9359 | 0.9342 | 0.9222 | 0.909 | 0.9043 | 0.9136 | 0.9325 |
| 9DDL | 0.4659 | 0.4708 | 0.4374 | 0.5885 | 0.5875 | 0.5862 | 0.6068 |
| 9DZS | 0.9554 | 0.9321 | 0.9573 | 0.9318 | 0.922 | 0.9253 | 0.91 |
| 9EMO | 0.9039 | 0.895 | 0.8895 | 0.9008 | 0.9002 | 0.9026 | 0.8924 |
| 9FJ1 | 0.9654 | 0.9682 | 0.9718 | 0.9742 | 0.9701 | 0.9706 | 0.974 |
| 9GRZ | 0.9337 | 0.9271 | 0.9456 | 0.9168 | 0.9397 | 0.9438 | 0.9234 |
| 9GV5 | 0.9662 | 0.9513 | 0.9403 | 0.9419 | 0.9326 | 0.934 | 0.9474 |
| 9H92 | 0.9745 | 0.9744 | 0.9786 | 0.9813 | 0.9772 | 0.9756 | 0.9799 |
| 9HHQ | 0.8735 | 0.8693 | 0.8473 | 0.897 | 0.8386 | 0.9204 | 0.8429 |
| 9HTU | 0.8907 | 0.8791 | 0.8653 | 0.8824 | 0.9344 | 0.8936 | 0.9097 |
| 9J7V | 0.9249 | 0.9293 | 0.9473 | 0.9196 | 0.9402 | 0.9559 | 0.9482 |
| 9JDS | 0.925 | 0.936 | 0.9409 | 0.9608 | 0.9336 | 0.9431 | 0.919 |
| 9JJU | 0.8602 | 0.8397 | 0.7922 | 0.7979 | 0.8127 | 0.8113 | 0.7979 |
| 9JVM | 0.9401 | 0.941 | 0.9237 | 0.9292 | 0.9281 | 0.9425 | 0.9461 |
| 9MRB | 0.547 | 0.6317 | 0.5033 | 0.5869 | 0.5863 | 0.6036 | 0.6685 |
| 9NOY | 0.8606 | 0.8507 | 0.8807 | 0.8889 | 0.8658 | 0.8601 | 0.843 |
| Median | 0.89195 | 0.8742 | 0.8811 | 0.88565 | 0.8785 | 0.88265 | 0.8773 |

**Supplementary Table 6:** The TIC-RMWD metrics between the generated conformational distribution and the reference MD distribution for seven methods on each of the 30 independent test proteins. The best result for each protein was highlighted in bold.

| PDB ID | Model_M | Model_C | Model_A | Model_1K | Model_2K | Model_3k | DynoM |
| --- | --- | --- | --- | --- | --- | --- | --- |
| 8XCL | 1.7969 | 1.0593 | 0.9556 | 1.4523 | 1.5662 | 1.2171 | 1.6226 |
| 8XHY | 0.6238 | 0.5384 | 0.5746 | 0.5738 | 0.5472 | 0.5292 | 0.5645 |
| 8Y4Y | 0.7147 | 0.7138 | 0.6754 | 0.6688 | 0.7178 | 0.7409 | 0.6143 |
| 8YT7 | 0.7738 | 0.7411 | 0.6817 | 0.7772 | 0.8144 | 0.7949 | 0.9077 |
| 8Z13 | 0.6755 | 0.7131 | 0.6581 | 0.6559 | 0.6569 | 0.6728 | 0.607 |
| 8Z3H | 0.5566 | 0.5505 | 0.549 | 0.512 | 0.5468 | 0.5922 | 0.5345 |
| 8Z3I | 0.6435 | 0.6564 | 0.6967 | 0.5841 | 0.5987 | 0.592 | 0.5878 |
| 8ZGZ | 0.8943 | 0.8238 | 0.8078 | 0.8923 | 0.9069 | 0.9042 | 0.9114 |
| 8ZIC | 0.7643 | 0.6919 | 0.7589 | 1.0193 | 1.1194 | 1.0893 | 1.1593 |
| 8ZKE | 0.6009 | 0.7135 | 0.6415 | 0.5869 | 0.5835 | 0.5758 | 0.6155 |
| 8ZVA | 0.4436 | 0.5892 | 0.5921 | 0.6382 | 0.6016 | 0.7022 | 0.8765 |
| 9B86 | 0.7031 | 0.6359 | 0.527 | 0.5312 | 0.5103 | 0.5492 | 0.705 |
| 9BOJ | 0.8857 | 0.6401 | 0.6481 | 0.6961 | 0.6716 | 0.6667 | 0.8806 |
| 9C0A | 0.5764 | 0.6118 | 0.6324 | 0.5835 | 0.6109 | 0.57 | 0.5993 |
| 9CG2 | 0.7171 | 0.724 | 0.6887 | 0.6801 | 0.6322 | 0.61 | 0.8632 |
| 9DDL | 0.8746 | 0.8194 | 0.8559 | 0.9434 | 0.9072 | 0.91 | 0.9941 |
| 9DZS | 0.6133 | 0.6106 | 0.6267 | 0.6243 | 0.6365 | 0.628 | 0.6345 |
| 9EMO | 0.5873 | 0.8278 | 0.6125 | 0.5851 | 0.5808 | 0.5902 | 0.5664 |
| 9FJ1 | 0.6683 | 0.6784 | 0.6206 | 0.6402 | 0.6421 | 0.6348 | 0.5695 |
| 9GRZ | 0.8257 | 0.6741 | 0.6631 | 0.6645 | 0.7405 | 0.7276 | 0.7759 |
| 9GV5 | 0.679 | 0.6775 | 0.6636 | 0.7219 | 0.7199 | 0.7286 | 0.6711 |
| 9H92 | 0.6305 | 0.7921 | 0.6559 | 0.6303 | 0.5852 | 0.6551 | 0.6774 |
| 9HHQ | 0.687 | 0.6666 | 0.6713 | 0.6821 | 0.6971 | 0.736 | 0.7295 |
| 9HTU | 0.5268 | 0.5653 | 0.5417 | 0.5264 | 0.5292 | 0.5291 | 0.5815 |
| 9J7V | 0.829 | 0.8022 | 0.7753 | 0.7323 | 0.7158 | 0.6854 | 0.926 |
| 9JDS | 0.7099 | 0.7741 | 0.781 | 0.7706 | 0.8359 | 0.8206 | 0.8252 |
| 9JJU | 0.5223 | 0.5832 | 0.6563 | 0.5844 | 0.5717 | 0.5693 | 0.5682 |
| 9JVM | 0.9188 | 0.6755 | 0.6796 | 0.6585 | 0.6666 | 0.6646 | 0.7143 |
| 9MRB | 0.5296 | 0.5819 | 0.5509 | 0.5377 | 0.552 | 0.5427 | 0.5765 |
| 9NOY | 0.7534 | 0.8415 | 0.7056 | 0.8588 | 0.9217 | 0.9377 | 0.8649 |
| Median | 0.683 | 0.67795 | 0.6606 | 0.6572 | 0.6495 | 0.66565 | 0.6912 |

**Supplementary Table 7:** The TIC-JSD metrics between the generated conformational distribution and the reference MD distribution for seven methods on each of the 30 independent test proteins. The best result for each protein was highlighted in bold.

| PDB ID | Model_M | Model_C | Model_A | Model_1K | Model_2K | Model_3k | DynoM |
| --- | --- | --- | --- | --- | --- | --- | --- |
| 8XCL | 0.361 | 0.3769 | 0.3551 | 0.3098 | 0.3109 | 0.3021 | 0.3045 |
| 8XHY | 0.407 | 0.4003 | 0.411 | 0.3785 | 0.3689 | 0.3689 | 0.3076 |
| 8Y4Y | 0.3894 | 0.4461 | 0.3984 | 0.3541 | 0.3523 | 0.356 | 0.3367 |
| 8YT7 | 0.3211 | 0.3554 | 0.3446 | 0.3043 | 0.3058 | 0.2984 | 0.2813 |
| 8Z13 | 0.3537 | 0.4197 | 0.3959 | 0.3981 | 0.3917 | 0.4009 | 0.3652 |
| 8Z3H | 0.3095 | 0.3138 | 0.3029 | 0.2972 | 0.2997 | 0.2949 | 0.2913 |
| 8Z3I | 0.3606 | 0.4052 | 0.3851 | 0.3477 | 0.3583 | 0.3518 | 0.3419 |
| 8ZGZ | 0.4523 | 0.4914 | 0.4816 | 0.4781 | 0.4686 | 0.4616 | 0.4242 |
| 8ZIC | 0.3835 | 0.4109 | 0.3947 | 0.3868 | 0.3754 | 0.3751 | 0.3846 |
| 8ZKE | 0.4092 | 0.5051 | 0.4426 | 0.4076 | 0.3957 | 0.4019 | 0.3927 |
| 8ZVA | 0.2721 | 0.3789 | 0.351 | 0.3023 | 0.2997 | 0.3022 | 0.2939 |
| 9B86 | 0.3637 | 0.3802 | 0.3379 | 0.324 | 0.3227 | 0.319 | 0.3108 |
| 9BOJ | 0.3889 | 0.4586 | 0.4718 | 0.4264 | 0.4075 | 0.4157 | 0.39 |
| 9C0A | 0.4229 | 0.4531 | 0.4398 | 0.4149 | 0.4236 | 0.3991 | 0.4136 |
| 9CG2 | 0.3209 | 0.3728 | 0.3453 | 0.3216 | 0.3048 | 0.3149 | 0.2807 |
| 9DDL | 0.4433 | 0.4733 | 0.4443 | 0.4044 | 0.4038 | 0.4093 | 0.3889 |
| 9DZS | 0.3675 | 0.409 | 0.4046 | 0.3621 | 0.3486 | 0.365 | 0.3324 |
| 9EMO | 0.3794 | 0.432 | 0.4002 | 0.3874 | 0.381 | 0.381 | 0.3674 |
| 9FJ1 | 0.4126 | 0.4506 | 0.4223 | 0.3648 | 0.3713 | 0.3564 | 0.324 |
| 9GRZ | 0.3057 | 0.357 | 0.3417 | 0.3238 | 0.3309 | 0.3366 | 0.3033 |
| 9GV5 | 0.4232 | 0.4742 | 0.417 | 0.4153 | 0.4153 | 0.4055 | 0.3839 |
| 9H92 | 0.4649 | 0.5205 | 0.4825 | 0.4076 | 0.3947 | 0.4386 | 0.4164 |
| 9HHQ | 0.4164 | 0.4536 | 0.4399 | 0.3945 | 0.4023 | 0.4028 | 0.3704 |
| 9HTU | 0.3925 | 0.451 | 0.443 | 0.3827 | 0.378 | 0.3618 | 0.3652 |
| 9J7V | 0.4058 | 0.4413 | 0.4315 | 0.3804 | 0.3795 | 0.3752 | 0.3398 |
| 9JDS | 0.4323 | 0.4901 | 0.4654 | 0.4282 | 0.4164 | 0.4216 | 0.4103 |
| 9JJU | 0.3966 | 0.4364 | 0.4453 | 0.3927 | 0.3804 | 0.3849 | 0.3619 |
| 9JVM | 0.3686 | 0.3879 | 0.3967 | 0.4049 | 0.4073 | 0.4104 | 0.3996 |
| 9MRB | 0.3263 | 0.3811 | 0.3535 | 0.3219 | 0.3233 | 0.3124 | 0.3331 |
| 9NOY | 0.378 | 0.4418 | 0.3729 | 0.3267 | 0.3253 | 0.3203 | 0.3257 |
| **Median** | 0.3862 | 0.4342 | 0.4024 | 0.38155 | 0.3767 | 0.372 | 0.3519 |

**Supplementary Table 8:** Thirty-three additional independent test proteins used in Figure 3

See the Supplementary_table_8.csv

**Supplementary Table 9:** The PwD-JSD metrics between the generated conformational distribution and the reference MD distribution for four competing methods on each of the 63 independent test proteins. The best result for each protein was highlighted in bold.

| PDB ID | AlphaFlow | BioEmu | ConfDiff | DynoM |
| --- | --- | --- | --- | --- |
| 8QB6 | 0.4108 | 0.4223 | 0.4189 | 0.4159 |
| 8RIE | 0.3256 | 0.3508 | 0.327 | 0.342 |
| 8XCL | 0.2621 | 0.3176 | 0.3053 | 0.2843 |
| 8XHY | 0.3034 | 0.3064 | 0.2916 | 0.3027 |
| 8Y4Y | 0.3127 | 0.3345 | 0.3015 | 0.2901 |
| 8YT7 | 0.3291 | 0.3324 | 0.331 | 0.3191 |
| 8YZG | 0.3199 | 0.2884 | 0.3327 | 0.339 |
| 8Z13 | 0.3193 | 0.4313 | 0.3274 | 0.3168 |
| 8Z3H | 0.2913 | 0.2696 | 0.281 | 0.2817 |
| 8Z3I | 0.4467 | 0.536 | 0.4141 | 0.3115 |
| 8ZFE | 0.3602 | 0.528 | 0.3729 | 0.3606 |
| 8ZGZ | 0.4742 | 0.5203 | 0.4775 | 0.42 |
| 8ZIC | 0.3167 | 0.4152 | 0.3408 | 0.3148 |
| 8ZKE | 0.4583 | 0.5375 | 0.4849 | 0.3968 |
| 8ZNA | 0.404 | 0.3813 | 0.3884 | 0.3979 |
| 8ZVA | 0.3731 | 0.4354 | 0.3374 | 0.356 |
| 9B86 | 0.2925 | 0.4177 | 0.2937 | 0.2786 |
| 9BOJ | 0.407 | 0.5485 | 0.406 | 0.3828 |
| 9C0A | 0.4083 | 0.387 | 0.373 | 0.3591 |
| 9CG2 | 0.3331 | 0.3283 | 0.3619 | 0.3275 |
| 9DDL | 0.6139 | 0.596 | 0.5717 | 0.5723 |
| 9DEA | 0.4575 | 0.4398 | 0.4515 | 0.4465 |
| 9DEV | 0.4916 | 0.3952 | 0.4654 | 0.4702 |
| 9DFP | 0.4364 | 0.3782 | 0.4089 | 0.4115 |
| 9DLH | 0.4672 | 0.5866 | 0.4379 | 0.4229 |
| 9DMR | 0.3648 | 0.3634 | 0.3895 | 0.3644 |
| 9DZS | 0.3841 | 0.3857 | 0.3554 | 0.3485 |
| 9EMO | 0.3473 | 0.4706 | 0.3545 | 0.3208 |
| 9FJ1 | 0.3977 | 0.3849 | 0.3654 | 0.3321 |
| 9FPO | 0.3726 | 0.429 | 0.368 | 0.3526 |
| 9GN5 | 0.3702 | 0.448 | 0.3684 | 0.369 |
| 9GRZ | 0.5544 | 0.5746 | 0.4921 | 0.5025 |
| 9GV5 | 0.4562 | 0.4847 | 0.3716 | 0.4203 |
| 9GYE | 0.3311 | 0.4159 | 0.3463 | 0.3203 |
| 9H92 | 0.3247 | 0.4025 | 0.3188 | 0.2955 |
| 9HHQ | 0.4965 | 0.4876 | 0.3913 | 0.4468 |
| 9HTF | 0.4219 | 0.3914 | 0.4025 | 0.3957 |
| 9HTU | 0.3584 | 0.3412 | 0.3366 | 0.3324 |
| 9J08 | 0.3548 | 0.5122 | 0.3423 | 0.3387 |
| 9J7V | 0.3314 | 0.5659 | 0.3482 | 0.3165 |
| 9JDS | 0.4328 | 0.5344 | 0.4087 | 0.3865 |
| 9JJU | 0.4512 | 0.4117 | 0.4196 | 0.3902 |
| 9JV1 | 0.4125 | 0.445 | 0.3371 | 0.3293 |
| 9JVM | 0.4866 | 0.6071 | 0.4971 | 0.4998 |
| 9KN2 | 0.3898 | 0.3479 | 0.3105 | 0.3346 |
| 9L1Y | 0.4148 | 0.497 | 0.4009 | 0.3773 |
| 9LB7 | 0.3516 | 0.3602 | 0.3282 | 0.3191 |
| 9LPT | 0.4101 | 0.3905 | 0.3523 | 0.3354 |
| 9M38 | 0.4211 | 0.4237 | 0.4151 | 0.4095 |
| 9MRB | 0.3406 | 0.4206 | 0.4361 | 0.3158 |
| 9NOY | 0.4417 | 0.5185 | 0.3715 | 0.3639 |
| 9NT5 | 0.4902 | 0.4789 | 0.4601 | 0.4365 |
| 9O3Q | 0.4605 | 0.4295 | 0.4529 | 0.455 |
| 9OQY | 0.4591 | 0.4928 | 0.4503 | 0.4262 |
| 9OVQ | 0.3358 | 0.378 | 0.3466 | 0.3406 |
| 9QF3 | 0.4072 | 0.4128 | 0.4018 | 0.4002 |
| 9QF8 | 0.4174 | 0.4781 | 0.3877 | 0.3962 |
| 9QFA | 0.4229 | 0.4047 | 0.3804 | 0.3816 |
| 9QG9 | 0.2539 | 0.4423 | 0.2187 | 0.3997 |
| 9S2T | 0.3255 | 0.4186 | 0.3575 | 0.3365 |
| 9S8V | 0.4485 | 0.3658 | 0.3758 | 0.3078 |
| 9S9C | 0.4089 | 0.388 | 0.3915 | 0.371 |
| 9UL7 | 0.3457 | 0.425 | 0.3066 | 0.3028 |
| **Median** | 0.404 | 0.4206 | 0.3716 | **0.3591** |

**Supplementary Table 10:** The Rg-JSD metrics between the generated conformational distribution and the reference MD distribution for four competing methods on each of the 63 independent test proteins. The best result for each protein was highlighted in bold.

| PDB ID | AlphaFlow | BioEmu | ConfDiff | DynoM |
| --- | --- | --- | --- | --- |
| 8QB6 | 0.7315 | 0.7994 | 0.812 | 0.8101 |
| 8RIE | 0.4342 | 0.4068 | 0.548 | 0.6551 |
| 8XCL | 0.1247 | 0.253 | 0.2911 | 0.159 |
| 8XHY | 0.3095 | 0.346 | 0.2027 | 0.1982 |
| 8Y4Y | 0.3601 | 0.554 | 0.4529 | 0.3038 |
| 8YT7 | 0.4161 | 0.2707 | 0.4343 | 0.2697 |
| 8YZG | 0.3079 | 0.2341 | 0.319 | 0.3069 |
| 8Z13 | 0.3654 | 0.2245 | 0.4594 | 0.3147 |
| 8Z3H | 0.4308 | 0.27 | 0.3732 | 0.1454 |
| 8Z3I | 0.4151 | 0.6419 | 0.4517 | 0.3217 |
| 8ZFE | 0.2831 | 0.6758 | 0.5465 | 0.2008 |
| 8ZGZ | 0.5658 | 0.5677 | 0.3934 | 0.376 |
| 8ZIC | 0.3357 | 0.4446 | 0.3543 | 0.3518 |
| 8ZKE | 0.8059 | 0.5737 | 0.5287 | 0.6489 |
| 8ZNA | 0.2504 | 0.4077 | 0.254 | 0.2773 |
| 8ZVA | 0.7851 | 0.7204 | 0.6187 | 0.7411 |
| 9B86 | 0.1415 | 0.6645 | 0.2608 | 0.2466 |
| 9BOJ | 0.8186 | 0.4362 | 0.5334 | 0.5164 |
| 9C0A | 0.331 | 0.3736 | 0.2326 | 0.2827 |
| 9CG2 | 0.3491 | 0.29 | 0.4149 | 0.3689 |
| 9DDL | 0.8248 | 0.7962 | 0.8112 | 0.8085 |
| 9DEA | 0.8001 | 0.6724 | 0.5031 | 0.5058 |
| 9DEV | 0.7162 | 0.7106 | 0.7163 | 0.7655 |
| 9DFP | 0.8086 | 0.6622 | 0.7422 | 0.7433 |
| 9DLH | 0.4392 | 0.7481 | 0.6257 | 0.5035 |
| 9DMR | 0.2147 | 0.2832 | 0.3279 | 0.1914 |
| 9DZS | 0.7179 | 0.4854 | 0.4044 | 0.5968 |
| 9EMO | 0.4463 | 0.6915 | 0.32 | 0.2601 |
| 9FJ1 | 0.1662 | 0.5008 | 0.3797 | 0.4634 |
| 9FPO | 0.6479 | 0.5665 | 0.6284 | 0.5401 |
| 9GN5 | 0.2809 | 0.4456 | 0.3769 | 0.3503 |
| 9GRZ | 0.7091 | 0.4255 | 0.2958 | 0.3615 |
| 9GV5 | 0.5492 | 0.5364 | 0.5433 | 0.5887 |
| 9GYE | 0.3212 | 0.6 | 0.5975 | 0.4961 |
| 9H92 | 0.6631 | 0.7116 | 0.3184 | 0.3142 |
| 9HHQ | 0.5934 | 0.4544 | 0.4156 | 0.4391 |
| 9HTF | 0.247 | 0.4984 | 0.3347 | 0.3982 |
| 9HTU | 0.2472 | 0.5059 | 0.3231 | 0.3339 |
| 9J08 | 0.7589 | 0.7853 | 0.6856 | 0.6468 |
| 9J7V | 0.4492 | 0.3805 | 0.6463 | 0.4579 |
| 9JDS | 0.5459 | 0.7669 | 0.71 | 0.5455 |
| 9JJU | 0.667 | 0.4692 | 0.4041 | 0.3634 |
| 9JV1 | 0.2889 | 0.3518 | 0.3771 | 0.3199 |
| 9JVM | 0.3788 | 0.7908 | 0.5426 | 0.2526 |
| 9KN2 | 0.4811 | 0.4998 | 0.3048 | 0.3574 |
| 9L1Y | 0.7554 | 0.6799 | 0.6053 | 0.5947 |
| 9LB7 | 0.5068 | 0.3652 | 0.4783 | 0.1589 |
| 9LPT | 0.575 | 0.3955 | 0.4411 | 0.4633 |
| 9M38 | 0.6317 | 0.5334 | 0.6536 | 0.6365 |
| 9MRB | 0.451 | 0.3782 | 0.4245 | 0.4294 |
| 9NOY | 0.154 | 0.1933 | 0.2639 | 0.2756 |
| 9NT5 | 0.7653 | 0.5028 | 0.7415 | 0.703 |
| 9O3Q | 0.8321 | 0.5656 | 0.8323 | 0.8302 |
| 9OQY | 0.6675 | 0.3807 | 0.4306 | 0.5127 |
| 9OVQ | 0.5406 | 0.3706 | 0.294 | 0.4057 |
| 9QF3 | 0.2184 | 0.5887 | 0.6265 | 0.6114 |
| 9QF8 | 0.2863 | 0.6823 | 0.7034 | 0.657 |
| 9QFA | 0.4718 | 0.4092 | 0.5116 | 0.3197 |
| 9QG9 | 0.3172 | 0.3886 | 0.209 | 0.4453 |
| 9S2T | 0.1654 | 0.5407 | 0.6524 | 0.6208 |
| 9S8V | 0.6308 | 0.2802 | 0.4293 | 0.2644 |
| 9S9C | 0.4337 | 0.3692 | 0.4509 | 0.4843 |
| 9UL7 | 0.7924 | 0.4845 | 0.361 | 0.4623 |
| **Median** | 0.4492 | 0.4984 | 0.4411 | **0.4294** |

**Supplementary Table 11:** The rRMSF metrics between the generated conformational distribution and the reference MD distribution for four competing methods on each of the 63 independent test proteins. The best result for each protein was highlighted in bold.

| PDB ID | AlphaFlow | BioEmu | ConfDiff | DynoM |
| --- | --- | --- | --- | --- |
| 8QB6 | 0.8045 | 0.8395 | 0.8029 | 0.8247 |
| 8RIE | 0.5216 | 0.4969 | 0.5542 | 0.5362 |
| 8XCL | 0.9002 | 0.8069 | 0.8967 | 0.9247 |
| 8XHY | 0.8891 | 0.8708 | 0.8441 | 0.8768 |
| 8Y4Y | 0.621 | 0.5815 | 0.6784 | 0.6011 |
| 8YT7 | 0.8703 | 0.7446 | 0.8055 | 0.7936 |
| 8YZG | 0.914 | 0.8296 | 0.9145 | 0.9009 |
| 8Z13 | 0.7402 | 0.7762 | 0.822 | 0.7992 |
| 8Z3H | 0.8883 | 0.8733 | 0.9326 | 0.9114 |
| 8Z3I | 0.7288 | 0.5361 | 0.4353 | 0.9255 |
| 8ZFE | 0.9548 | 0.9668 | 0.9618 | 0.9655 |
| 8ZGZ | 0.8283 | 0.8871 | 0.9245 | 0.9634 |
| 8ZIC | 0.8187 | 0.8844 | 0.8734 | 0.8068 |
| 8ZKE | 0.7839 | 0.7245 | 0.7338 | 0.7354 |
| 8ZNA | 0.6044 | 0.64 | 0.6971 | 0.6427 |
| 8ZVA | 0.7543 | 0.8666 | 0.9389 | 0.7169 |
| 9B86 | 0.9127 | 0.924 | 0.8388 | 0.8327 |
| 9BOJ | 0.9413 | 0.3069 | 0.8496 | 0.8526 |
| 9C0A | 0.7412 | 0.7662 | 0.7744 | 0.7642 |
| 9CG2 | 0.8704 | 0.7441 | 0.8174 | 0.9411 |
| 9DDL | 0.5594 | 0.53 | 0.6154 | 0.5982 |
| 9DEA | 0.742 | 0.6955 | 0.879 | 0.8511 |
| 9DEV | 0.6915 | 0.6806 | 0.6729 | 0.7385 |
| 9DFP | 0.7943 | 0.831 | 0.8126 | 0.8033 |
| 9DLH | 0.943 | 0.9452 | 0.9536 | 0.941 |
| 9DMR | 0.9742 | 0.6045 | 0.9552 | 0.9469 |
| 9DZS | 0.8884 | 0.6796 | 0.8774 | 0.8982 |
| 9EMO | 0.8252 | 0.837 | 0.8208 | 0.893 |
| 9FJ1 | 0.9649 | 0.9639 | 0.9691 | 0.9622 |
| 9FPO | 0.8373 | 0.3836 | 0.8818 | 0.882 |
| 9GN5 | 0.9505 | 0.5865 | 0.9265 | 0.7942 |
| 9GRZ | 0.9366 | 0.931 | 0.9298 | 0.9421 |
| 9GV5 | 0.9323 | 0.6068 | 0.9455 | 0.9181 |
| 9GYE | 0.6286 | 0.5747 | 0.742 | 0.7731 |
| 9H92 | 0.9718 | 0.9701 | 0.9535 | 0.9808 |
| 9HHQ | 0.8798 | 0.8184 | 0.8942 | 0.8832 |
| 9HTF | 0.8877 | 0.7872 | 0.7904 | 0.8999 |
| 9HTU | 0.9136 | 0.8643 | 0.8575 | 0.8985 |
| 9J08 | 0.7148 | 0.6373 | 0.6976 | 0.7222 |
| 9J7V | 0.9311 | 0.9506 | 0.9229 | 0.95 |
| 9JDS | 0.9259 | 0.9423 | 0.9345 | 0.9335 |
| 9JJU | 0.8833 | 0.6978 | 0.5642 | 0.783 |
| 9JV1 | 0.7558 | 0.309 | 0.7997 | 0.7966 |
| 9JVM | 0.9473 | 0.9464 | 0.9453 | 0.9419 |
| 9KN2 | 0.8393 | 0.6311 | 0.9034 | 0.8404 |
| 9L1Y | 0.8055 | 0.6684 | 0.8571 | 0.8518 |
| 9LB7 | 0.9109 | 0.8815 | 0.8514 | 0.8741 |
| 9LPT | 0.4836 | 0.588 | 0.8916 | 0.9353 |
| 9M38 | 0.5888 | 0.344 | 0.7666 | 0.8608 |
| 9MRB | 0.3288 | 0.252 | 0.4393 | 0.6424 |
| 9NOY | 0.869 | 0.8462 | 0.8908 | 0.8396 |
| 9NT5 | 0.794 | 0.5652 | 0.7831 | 0.7942 |
| 9O3Q | 0.7629 | 0.8084 | 0.7939 | 0.792 |
| 9OQY | 0.8929 | 0.742 | 0.9031 | 0.9057 |
| 9OVQ | 0.8904 | 0.6381 | 0.6195 | 0.6505 |
| 9QF3 | 0.8246 | 0.8745 | 0.8323 | 0.8693 |
| 9QF8 | 0.7371 | 0.5228 | 0.8536 | 0.9109 |
| 9QFA | 0.9429 | 0.9448 | 0.9628 | 0.9798 |
| 9QG9 | 0.9251 | 0.979 | 0.9916 | 0.9566 |
| 9S2T | 0.9615 | 0.7569 | 0.9481 | 0.9609 |
| 9S8V | 0.9618 | 0.9572 | 0.9371 | 0.9765 |
| 9S9C | 0.762 | 0.5962 | 0.8494 | 0.86 |
| 9UL7 | 0.8769 | 0.8172 | 0.8765 | 0.865 |
| **Median** | **0.8703** | 0.7662 | 0.8571 | 0.8693 |

**Supplementary Table 12:** The TIC-RMWD metrics between the generated conformational distribution and the reference MD distribution for four competing methods on each of the 63 independent test proteins. The best result for each protein was highlighted in bold.

| PDB ID | AlphaFlow | BioEmu | ConfDiff | DynoM |
| --- | --- | --- | --- | --- |
| 8QB6 | 0.8257 | 0.8433 | 0.9329 | 0.8035 |
| 8RIE | 1.1243 | 0.9855 | 1.2953 | 0.7554 |
| 8XCL | 1.2649 | 1.0512 | 1.9542 | 1.6226 |
| 8XHY | 0.9729 | 0.7353 | 0.575 | 0.5645 |
| 8Y4Y | 0.82 | 0.6852 | 0.6412 | 0.6143 |
| 8YT7 | 1.4027 | 0.5607 | 1.0157 | 0.9077 |
| 8YZG | 2.9957 | 0.8046 | 1.6759 | 1.5927 |
| 8Z13 | 1.9731 | 1.1747 | 0.5761 | 0.607 |
| 8Z3H | 0.6366 | 0.5892 | 0.78 | 0.5345 |
| 8Z3I | 0.9027 | 0.7826 | 0.6138 | 0.5878 |
| 8ZFE | 1.3145 | 0.5847 | 0.4856 | 0.5073 |
| 8ZGZ | 0.9238 | 0.8107 | 0.965 | 0.9114 |
| 8ZIC | 1.082 | 0.7331 | 1.2141 | 1.1593 |
| 8ZKE | 0.5799 | 0.7256 | 0.5811 | 0.6155 |
| 8ZNA | 0.708 | 0.5835 | 0.763 | 0.6803 |
| 8ZVA | 2.1408 | 0.7062 | 1.2063 | 0.8765 |
| 9B86 | 0.7525 | 0.74 | 0.6066 | 0.705 |
| 9BOJ | 0.6649 | 0.6663 | 0.6244 | 0.8806 |
| 9C0A | 0.6316 | 0.6413 | 0.7303 | 0.5993 |
| 9CG2 | 0.5129 | 1.0938 | 0.8903 | 0.8632 |
| 9DDL | 1.0376 | 0.8315 | 0.9677 | 0.9941 |
| 9DEA | 0.9318 | 0.7643 | 0.8332 | 0.6255 |
| 9DEV | 0.6644 | 0.6442 | 0.824 | 0.685 |
| 9DFP | 0.628 | 0.5383 | 0.5654 | 0.4783 |
| 9DLH | 0.777 | 0.7966 | 1.0816 | 0.9065 |
| 9DMR | 1.2475 | 0.6161 | 1.1488 | 0.9491 |
| 9DZS | 0.7716 | 0.5856 | 0.5749 | 0.6345 |
| 9EMO | 0.6338 | 0.5536 | 0.6656 | 0.5664 |
| 9FJ1 | 0.6135 | 0.7679 | 0.7536 | 0.5695 |
| 9FPO | 0.8741 | 0.6291 | 0.9 | 0.8583 |
| 9GN5 | 1.1913 | 0.8156 | 0.9644 | 0.9748 |
| 9GRZ | 2.0445 | 1.8625 | 0.7318 | 0.7759 |
| 9GV5 | 0.6894 | 0.7183 | 0.7202 | 0.6711 |
| 9GYE | 0.7678 | 0.779 | 0.6518 | 0.6721 |
| 9H92 | 1.016 | 1.0052 | 0.5897 | 0.6774 |
| 9HHQ | 0.5289 | 0.6302 | 0.6731 | 0.7295 |
| 9HTF | 0.7116 | 0.6234 | 0.6097 | 0.6162 |
| 9HTU | 0.7962 | 0.5418 | 0.6667 | 0.5815 |
| 9J08 | 0.5513 | 0.6406 | 0.9796 | 0.857 |
| 9J7V | 0.5251 | 0.619 | 0.8191 | 0.926 |
| 9JDS | 1.021 | 0.7478 | 0.7448 | 0.8252 |
| 9JJU | 0.5741 | 0.6595 | 0.5638 | 0.5682 |
| 9JV1 | 0.9388 | 0.7635 | 1.0982 | 1.2616 |
| 9JVM | 0.8815 | 0.7384 | 0.7095 | 0.7143 |
| 9KN2 | 0.7021 | 0.6712 | 0.549 | 0.5523 |
| 9L1Y | 0.926 | 0.8126 | 0.8919 | 0.9303 |
| 9LB7 | 0.6276 | 0.7384 | 0.7027 | 0.6415 |
| 9LPT | 0.4994 | 0.5348 | 0.8074 | 0.4936 |
| 9M38 | 0.5646 | 0.7617 | 0.7105 | 0.8151 |
| 9MRB | 0.5612 | 0.5223 | 0.573 | 0.5765 |
| 9NOY | 1.3858 | 0.8696 | 0.81 | 0.8649 |
| 9NT5 | 1.1975 | 0.8389 | 1.0543 | 0.791 |
| 9O3Q | 1.1134 | 0.7764 | 0.6248 | 0.6854 |
| 9OQY | 0.7601 | 0.7307 | 0.6787 | 0.6142 |
| 9OVQ | 0.7533 | 0.5804 | 0.5763 | 0.8768 |
| 9QF3 | 0.7226 | 0.7603 | 0.7633 | 0.7613 |
| 9QF8 | 0.6863 | 0.6824 | 0.7145 | 0.681 |
| 9QFA | 0.6662 | 0.6597 | 0.692 | 0.6708 |
| 9QG9 | 1.0893 | 0.8643 | 0.9987 | 0.6598 |
| 9S2T | 0.7323 | 0.7324 | 0.6252 | 0.6225 |
| 9S8V | 0.8935 | 0.7235 | 0.7607 | 0.7291 |
| 9S9C | 0.5473 | 0.7067 | 0.6302 | 0.6214 |
| 9UL7 | 0.8513 | 0.6403 | 0.5958 | 0.703 |
| **Median** | 0.777 | 0.7307 | 0.7303 | **0.6854** |

**Supplementary Table 13:** The TIC-JSD metrics between the generated conformational distribution and the reference MD distribution for four competing methods on each of the 63 independent test proteins. The best result for each protein was highlighted in bold.

| PDB ID | AlphaFlow | BioEmu | ConfDiff | DynoM |
| --- | --- | --- | --- | --- |
| 8QB6 | 0.3498 | 0.3724 | 0.3187 | 0.3678 |
| 8RIE | 0.4039 | 0.3841 | 0.352 | 0.403 |
| 8XCL | 0.3028 | 0.346 | 0.2887 | 0.3045 |
| 8XHY | 0.3339 | 0.3793 | 0.3386 | 0.3076 |
| 8Y4Y | 0.3218 | 0.4125 | 0.3414 | 0.3367 |
| 8YT7 | 0.2951 | 0.3437 | 0.2902 | 0.2813 |
| 8YZG | 0.3262 | 0.324 | 0.3466 | 0.3301 |
| 8Z13 | 0.3454 | 0.4101 | 0.3556 | 0.3652 |
| 8Z3H | 0.2721 | 0.304 | 0.2872 | 0.2913 |
| 8Z3I | 0.3309 | 0.3834 | 0.3316 | 0.3419 |
| 8ZFE | 0.3201 | 0.3969 | 0.3065 | 0.3251 |
| 8ZGZ | 0.3919 | 0.5366 | 0.4273 | 0.4242 |
| 8ZIC | 0.3602 | 0.3946 | 0.3766 | 0.3846 |
| 8ZKE | 0.3724 | 0.5211 | 0.3991 | 0.3927 |
| 8ZNA | 0.3934 | 0.4038 | 0.3949 | 0.4041 |
| 8ZVA | 0.2625 | 0.29 | 0.2683 | 0.2939 |
| 9B86 | 0.3039 | 0.3831 | 0.3218 | 0.3108 |
| 9BOJ | 0.3433 | 0.5469 | 0.3889 | 0.39 |
| 9C0A | 0.3596 | 0.4429 | 0.3987 | 0.4136 |
| 9CG2 | 0.2491 | 0.3163 | 0.2974 | 0.2807 |
| 9DDL | 0.4411 | 0.4233 | 0.4137 | 0.3889 |
| 9DEA | 0.2775 | 0.2949 | 0.2634 | 0.2629 |
| 9DEV | 0.346 | 0.3495 | 0.351 | 0.3571 |
| 9DFP | 0.2992 | 0.3002 | 0.2772 | 0.3014 |
| 9DLH | 0.3549 | 0.4201 | 0.3479 | 0.3404 |
| 9DMR | 0.3231 | 0.3547 | 0.2982 | 0.3059 |
| 9DZS | 0.2885 | 0.3328 | 0.3076 | 0.3324 |
| 9EMO | 0.3774 | 0.3907 | 0.4355 | 0.3674 |
| 9FJ1 | 0.3043 | 0.4259 | 0.3674 | 0.324 |
| 9FPO | 0.3539 | 0.3895 | 0.3824 | 0.4051 |
| 9GN5 | 0.3027 | 0.3802 | 0.3245 | 0.316 |
| 9GRZ | 0.3427 | 0.3974 | 0.3035 | 0.3033 |
| 9GV5 | 0.3833 | 0.5048 | 0.385 | 0.3839 |
| 9GYE | 0.355 | 0.4369 | 0.4253 | 0.4417 |
| 9H92 | 0.3252 | 0.4455 | 0.3797 | 0.4164 |
| 9HHQ | 0.3187 | 0.4722 | 0.4143 | 0.3704 |
| 9HTF | 0.3245 | 0.423 | 0.3977 | 0.3916 |
| 9HTU | 0.3592 | 0.4234 | 0.3517 | 0.3652 |
| 9J08 | 0.317 | 0.3813 | 0.3324 | 0.3553 |
| 9J7V | 0.3117 | 0.4103 | 0.3929 | 0.3398 |
| 9JDS | 0.4278 | 0.5044 | 0.4092 | 0.4103 |
| 9JJU | 0.39 | 0.3933 | 0.3732 | 0.3619 |
| 9JV1 | 0.3199 | 0.3803 | 0.3136 | 0.3112 |
| 9JVM | 0.3777 | 0.3665 | 0.3636 | 0.3996 |
| 9KN2 | 0.382 | 0.4338 | 0.3529 | 0.3655 |
| 9L1Y | 0.38 | 0.4773 | 0.3967 | 0.3675 |
| 9LB7 | 0.3923 | 0.4642 | 0.4093 | 0.419 |
| 9LPT | 0.2714 | 0.3171 | 0.2913 | 0.2851 |
| 9M38 | 0.3414 | 0.4365 | 0.4178 | 0.4312 |
| 9MRB | 0.2982 | 0.3109 | 0.3019 | 0.3331 |
| 9NOY | 0.3646 | 0.4392 | 0.3338 | 0.3257 |
| 9NT5 | 0.3471 | 0.348 | 0.3694 | 0.3314 |
| 9O3Q | 0.3939 | 0.4317 | 0.3839 | 0.443 |
| 9OQY | 0.409 | 0.5077 | 0.4177 | 0.4084 |
| 9OVQ | 0.4182 | 0.3454 | 0.3907 | 0.4092 |
| 9QF3 | 0.4261 | 0.4691 | 0.4545 | 0.4721 |
| 9QF8 | 0.3618 | 0.4297 | 0.4306 | 0.417 |
| 9QFA | 0.4114 | 0.4226 | 0.4102 | 0.4526 |
| 9QG9 | 0.3675 | 0.409 | 0.3543 | 0.3451 |
| 9S2T | 0.3821 | 0.4398 | 0.3471 | 0.3715 |
| 9S8V | 0.3957 | 0.4716 | 0.4034 | 0.4471 |
| 9S9C | 0.4319 | 0.495 | 0.4452 | 0.4655 |
| 9UL7 | 0.3617 | 0.484 | 0.362 | 0.4475 |
| **Median** | **0.3498** | 0.409 | 0.362 | 0.3655 |

**Supplementary Table 14:** PDB ID where DynoM surpassed other baseline models in predicting pairwise Cα-Cα deviation.


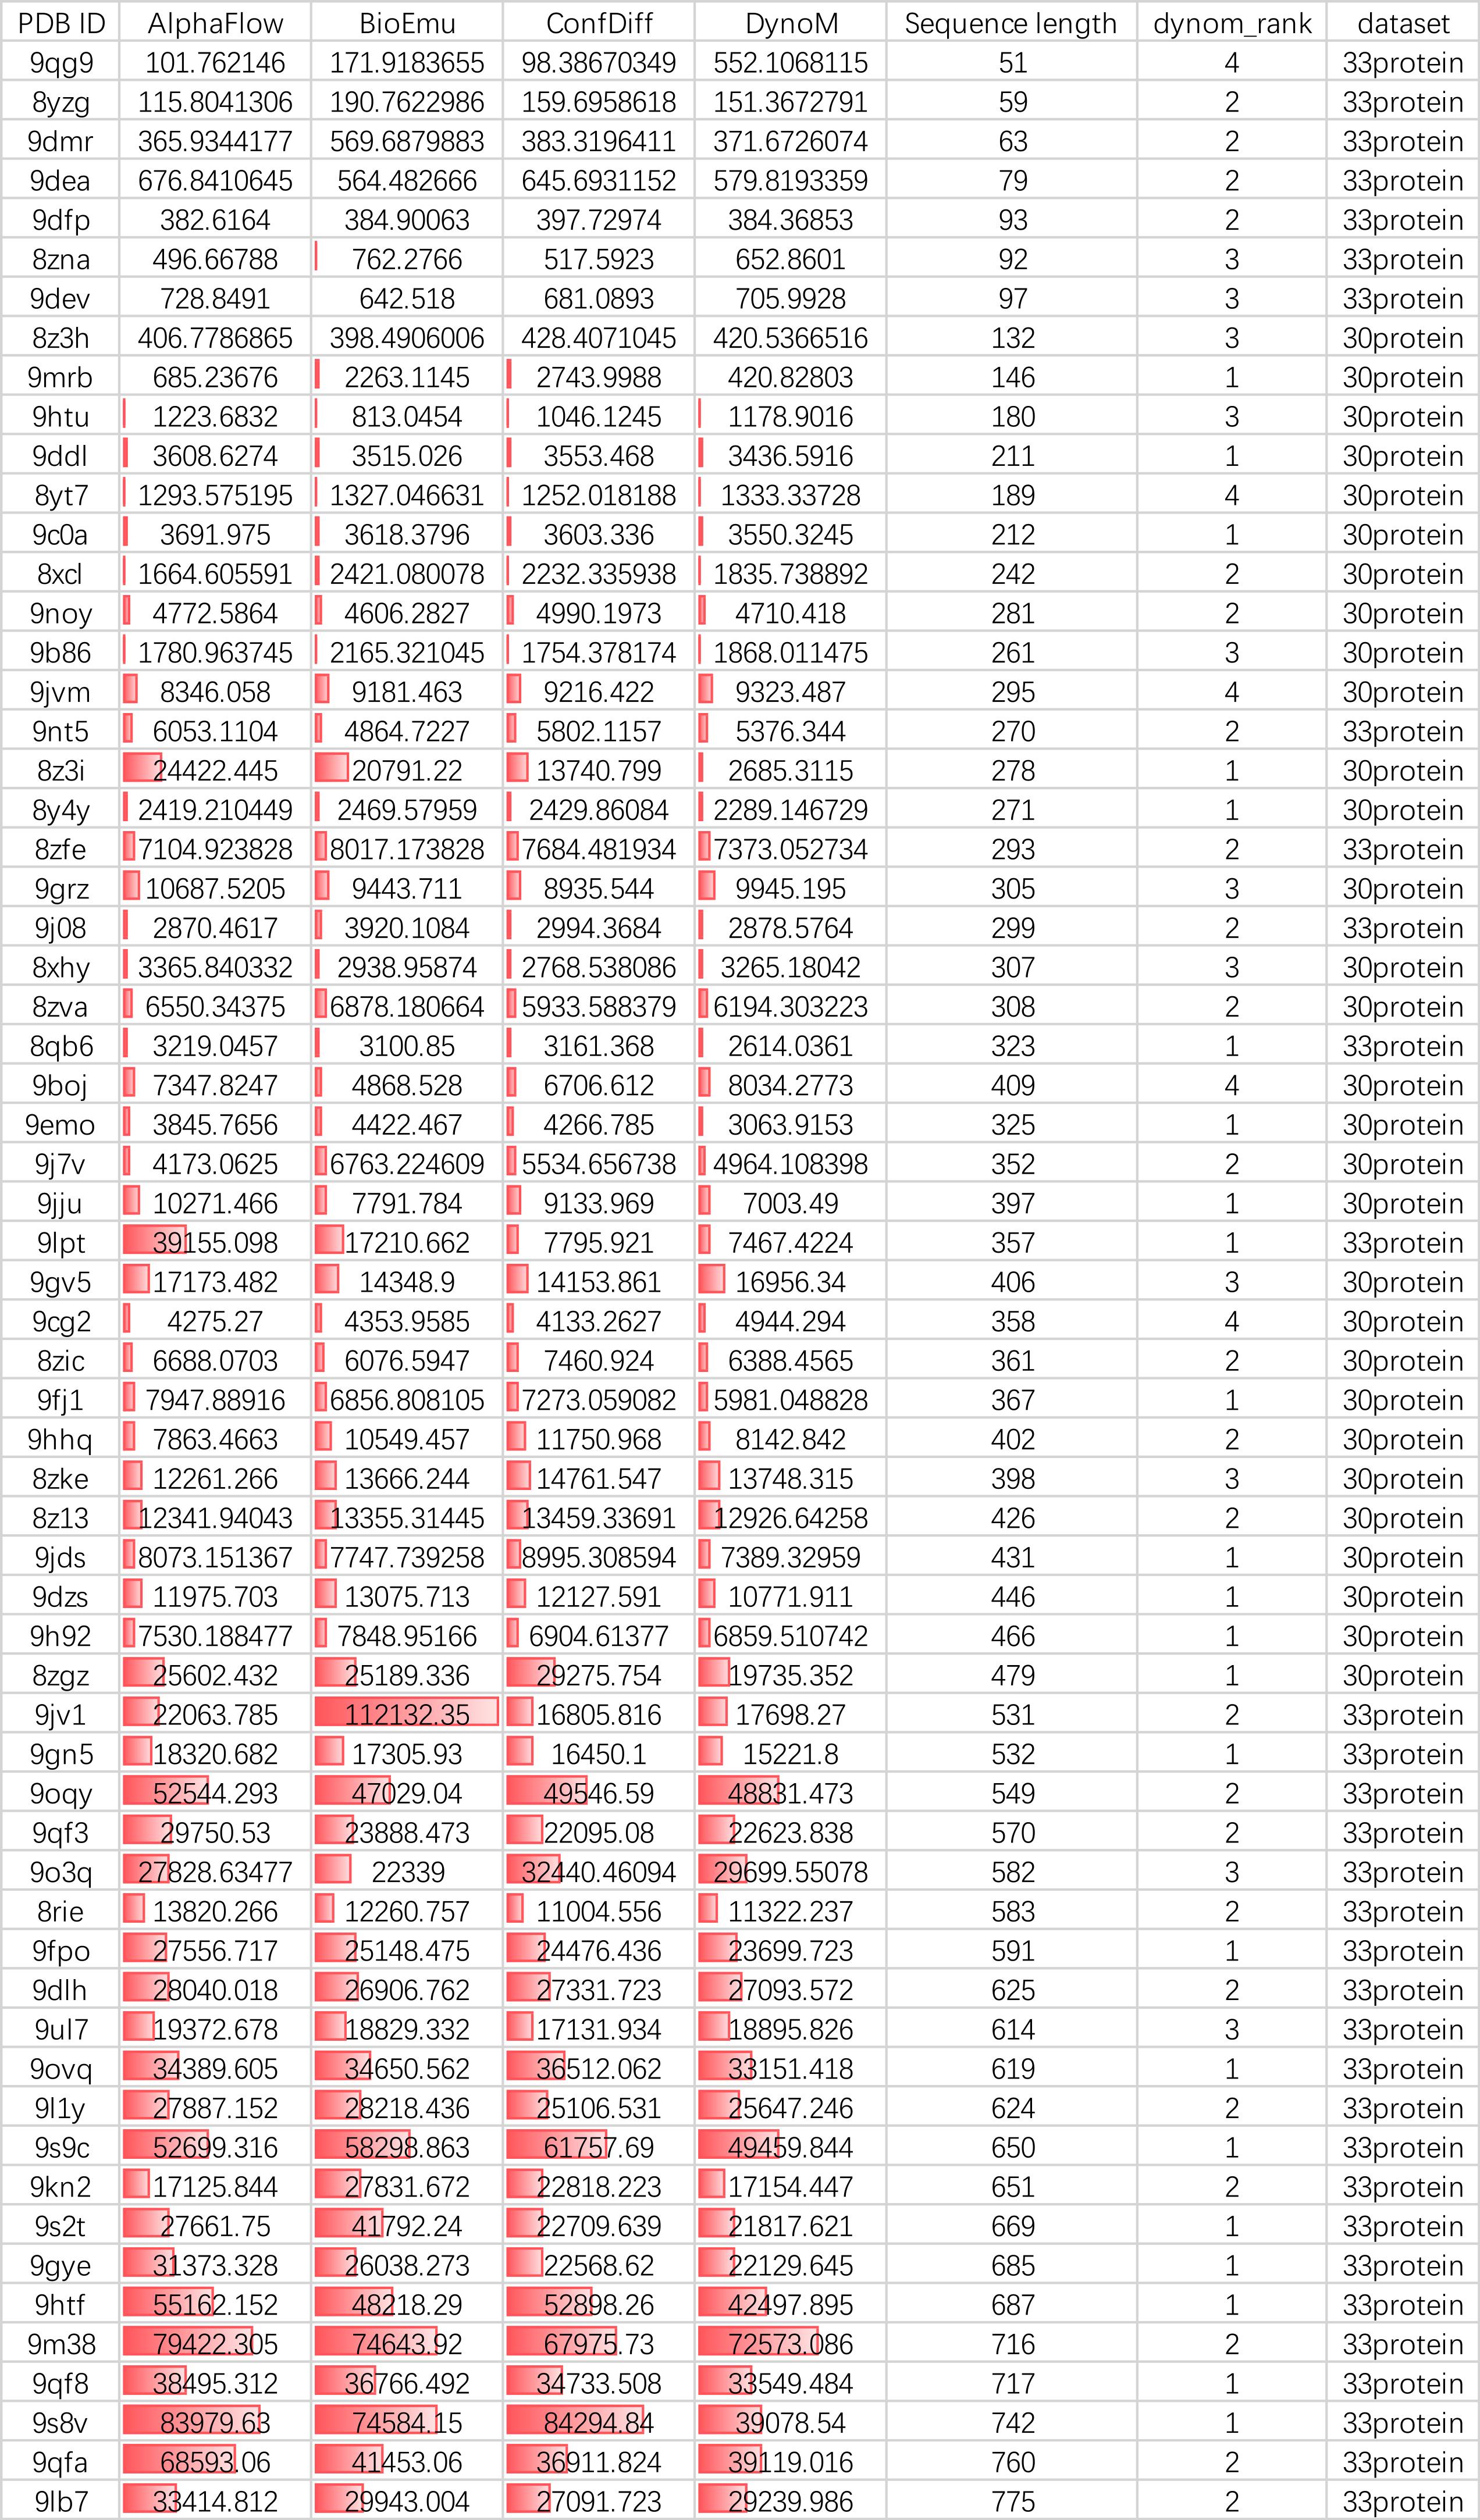


**Supplementary Table 15:** PDB ID of multi-state proteins collected from BioEmu and PathPre datasets

| PDB ID (State 1) | PDB ID (State 2) | Classification | Data From |
| --- | --- | --- | --- |
| 2WG5F | / | Local structural changes | BioEmu |
| 3UDCA | / | Local structural changes | BioEmu |
| 2ALJ | 1YR1 | Local structural changes | PathPre |
| 3DRF | 3DRJ | Apo-holo transitions | PathPre |
| 6MF4 | 6MF5 | Apo-holo transitions | PathPre |
| 4P6V | 7XK6 | Apo-holo transitions | PathPre |
| 2K9N | 2KDZ | Apo-holo transitions | PathPre |
| 4N3Y | 4N3Z | Rigid-body domain movements | PathPre |
| 6YAE | 2XA7 | Rigid-body domain movements | PathPre |
| 7STE | 8DQX | Rigid-body domain movements | PathPre |
| 1Y5O | 2N23 | Fold-unfold transitions | PathPre |

**S****upplementary Table 16:** The RMSD and DockQ metrics between the DynoM and AlphaFold3 on 20 antigen-antibody complexes( each complex contains 100 ensembles).

See the Supplementary_table_16.csv

**Supplementary Table 17:** Model hyperparameter settings during training

| Training stage | Pretrain | Finetune |
| --- | --- | --- |
| Batch size | 8 | 8 |
| Gradient Accumulation Steps | 4 | 4 |
| Optimizer | Adam(weight decay = 0.0) | Adam(weight decay = 0.0) |
| Learning Rate | 3e-4 | 3e-4 |
| Learning Rate Scheduler | ReduceLROnPlateau  (factor = 0.5 ) | ReduceLROnPlateau  (factor = 0.5 ) |
| Warm up steps | 5000 | 5000 |
| GPU type | A100 | A100 |
| Number of GPUs | 8 | 8 |

# **Supplementary Figures**


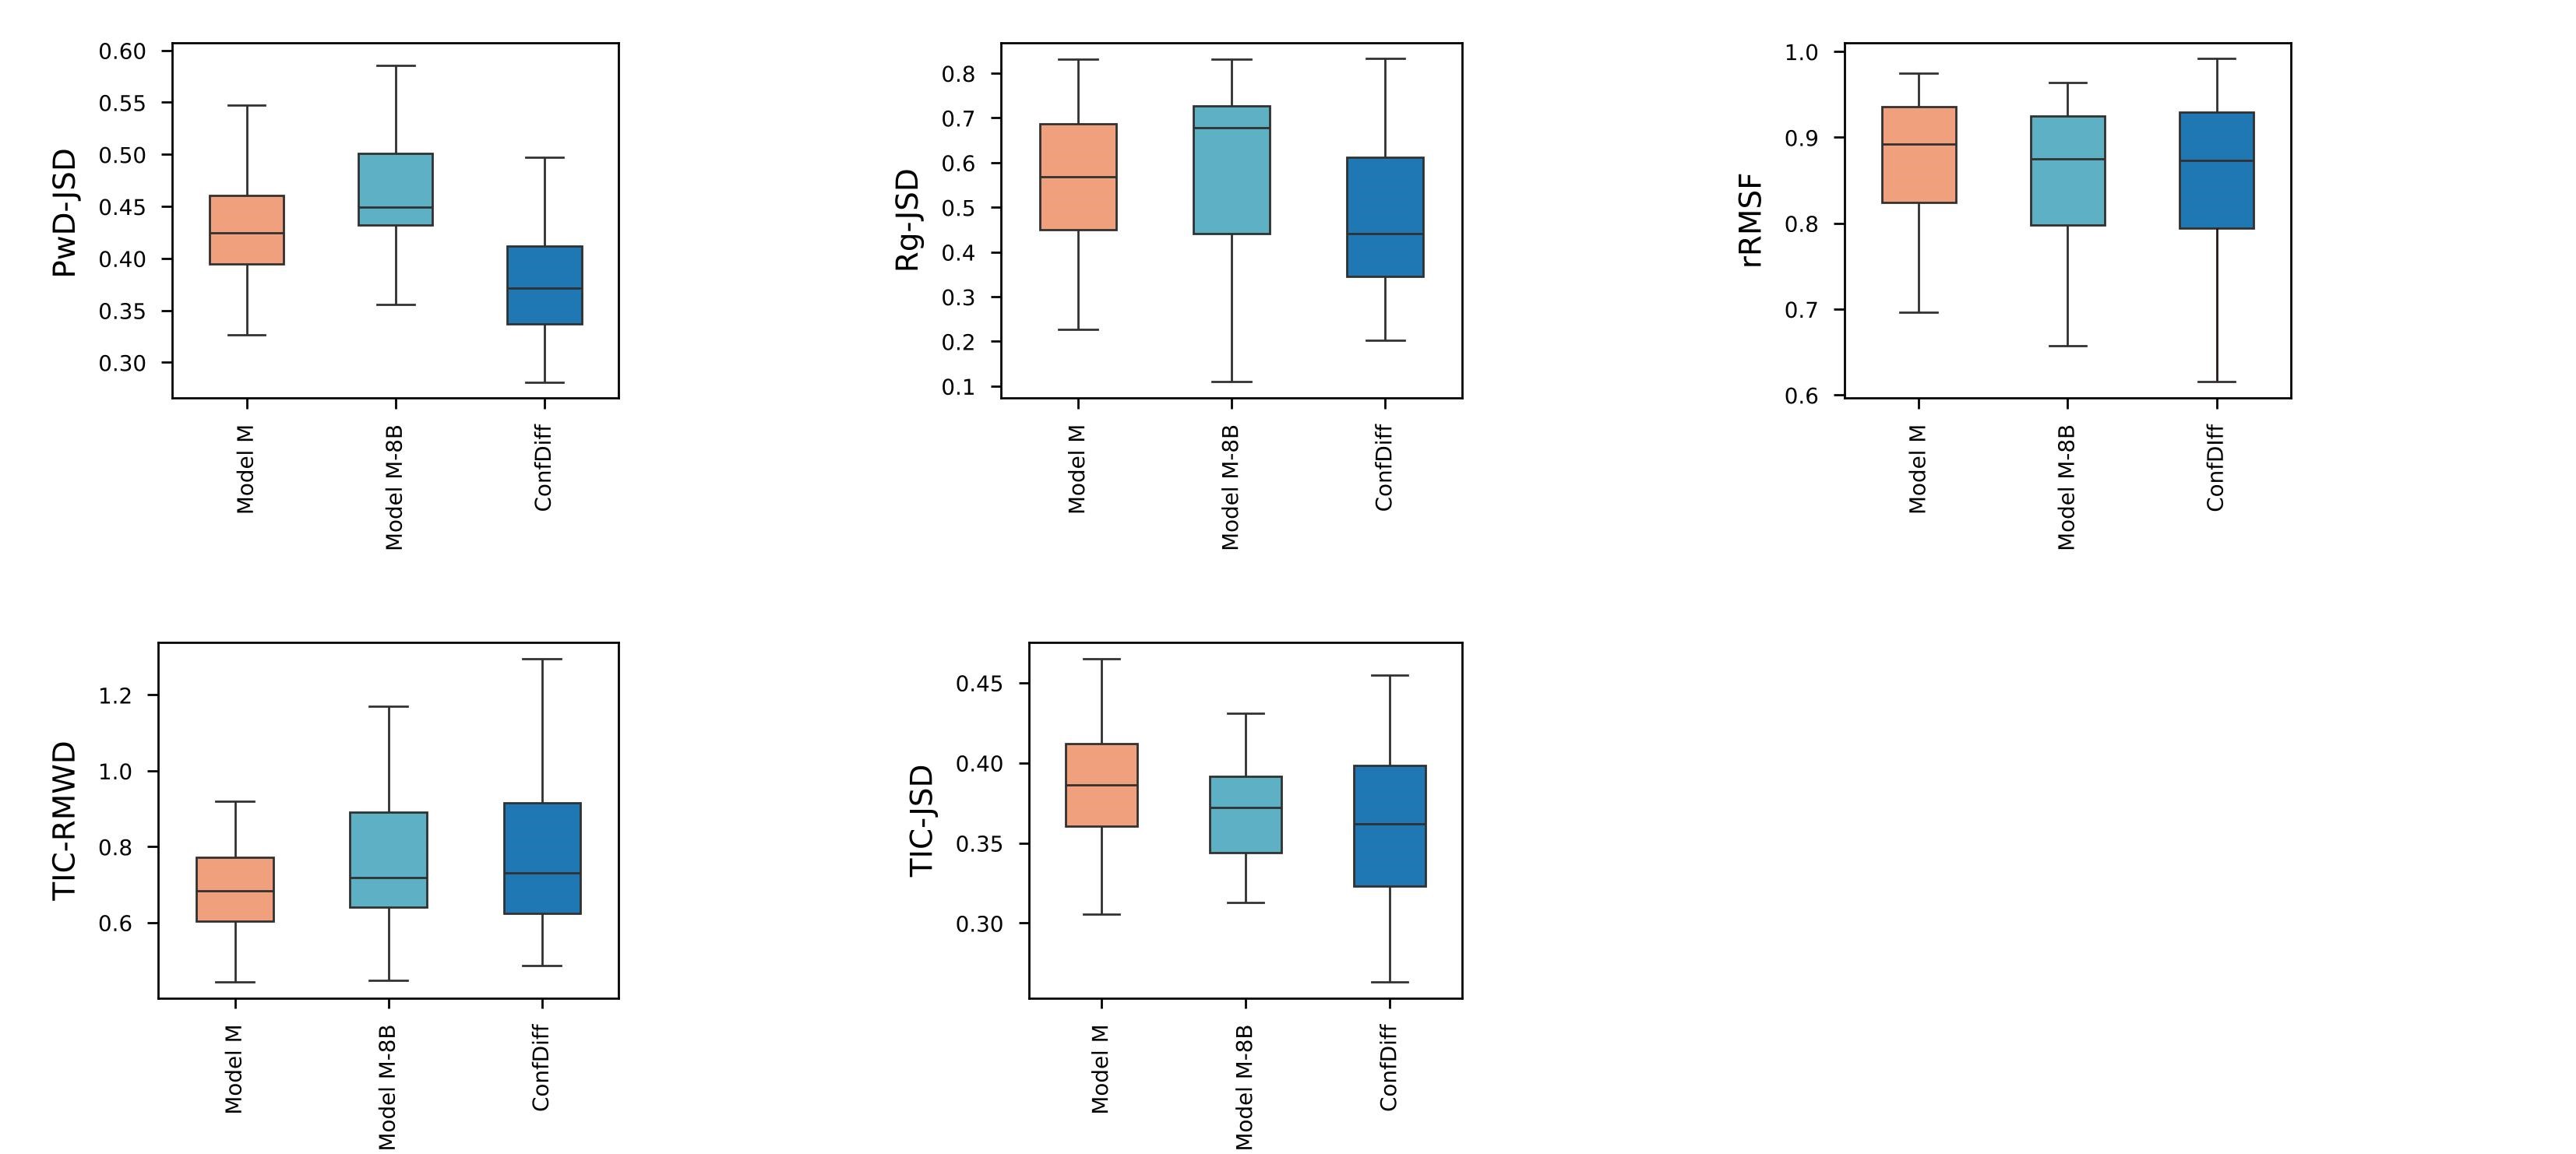


**Supplementary Figure 1.** The boxplots of PwD-JSD, Rg-JSD, rRMSF, TIC-RMWD, and TIC-JSD between the generated and the reference MD ensembles for three models: model M, model M-8B, and ConfDiff.The model M-8B is configured with 8 diffusion blocks and was trained on the monomers, while all other training hyperparameters remained identical to those of model M.


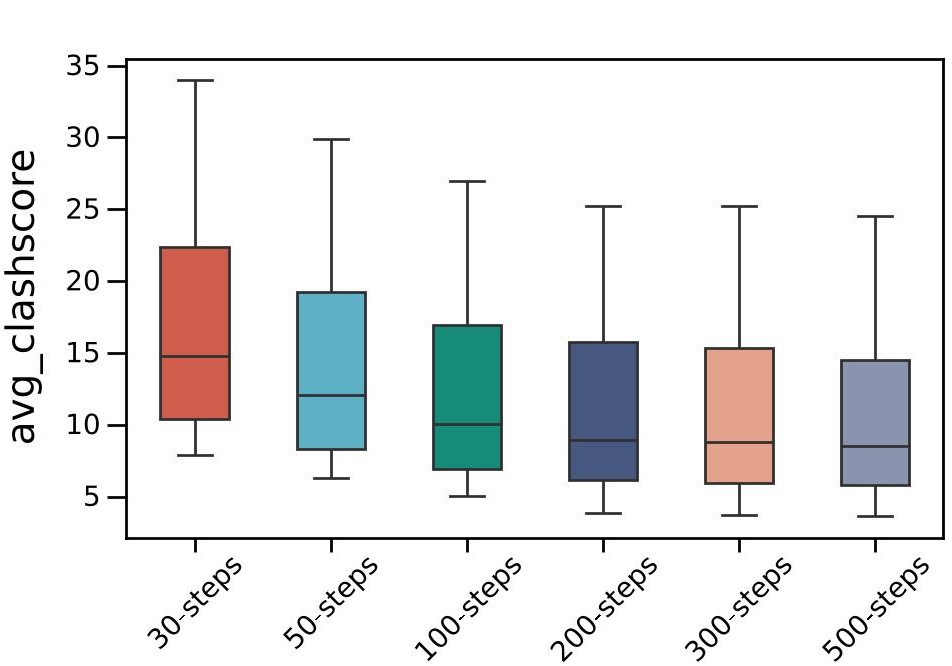


**Supplementary Figure 2.** Boxplots of mean clash scores for protein conformations sampled by the DynoM model across varying diffusion steps (30, 50, 100, 200, 300, and 500).


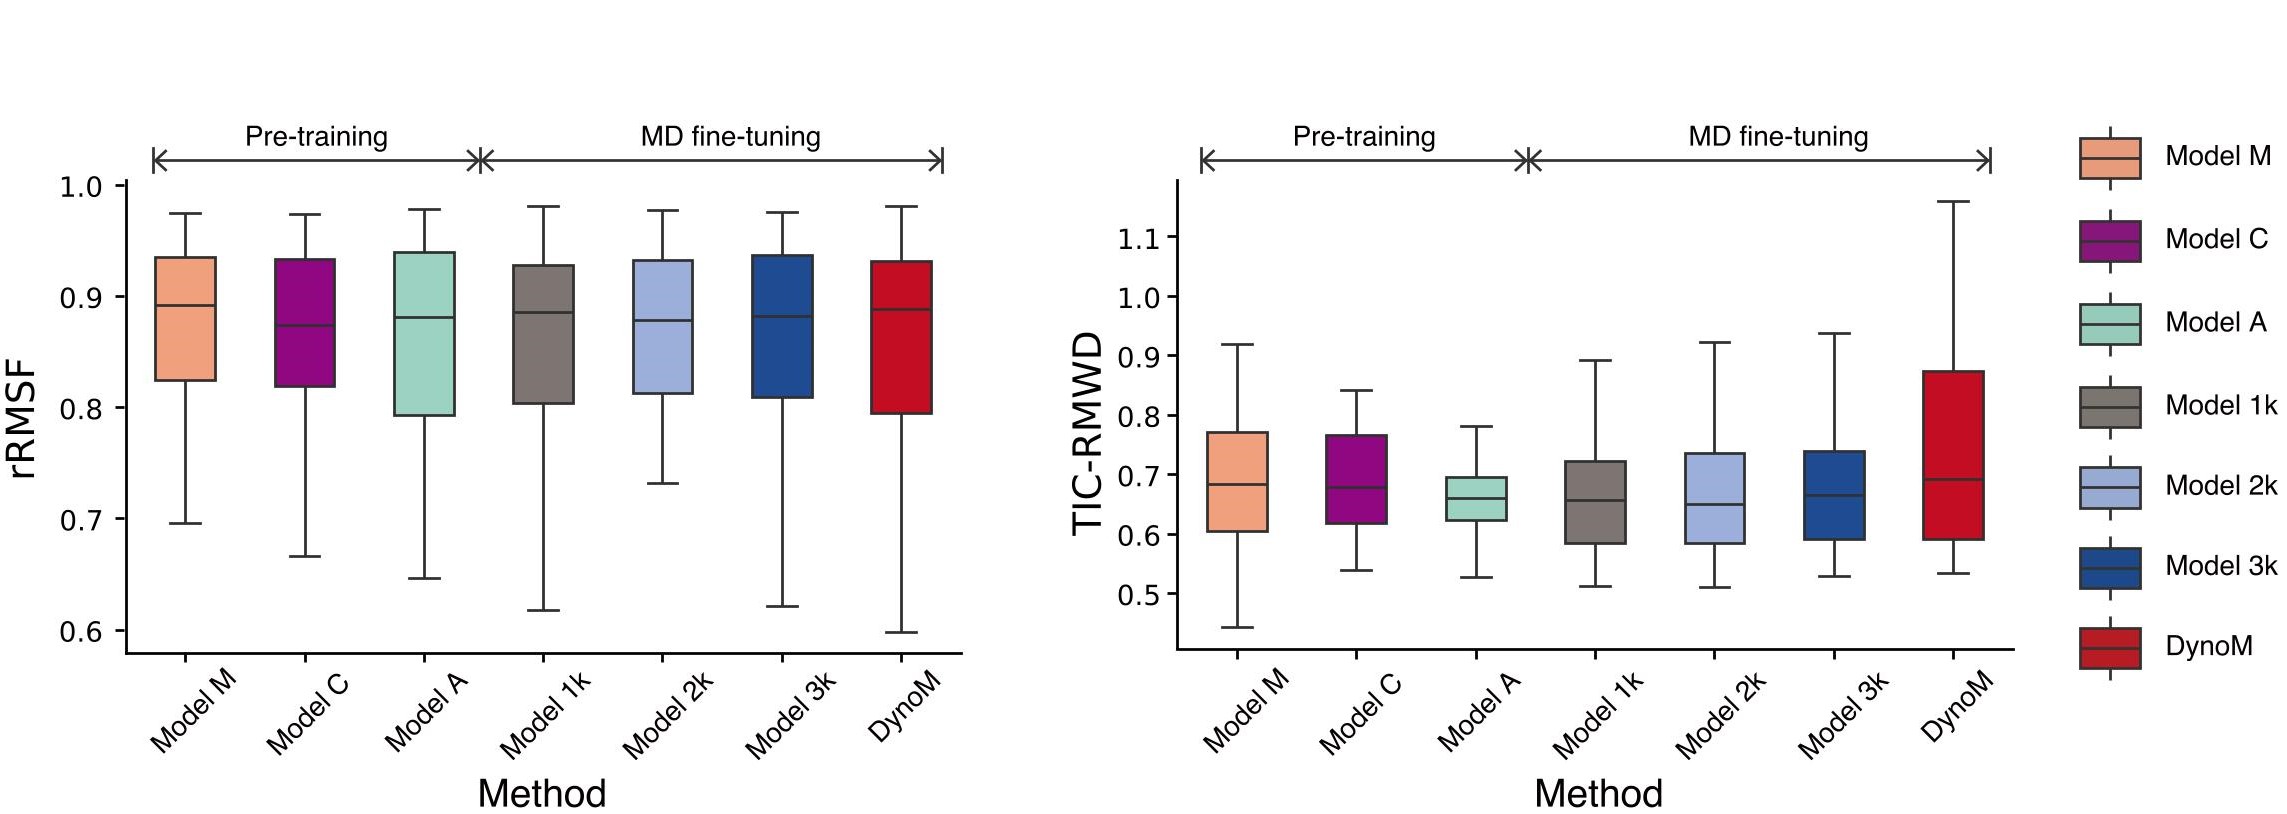


**Supplementary Figure 3.** Boxplots show the distributions of five evaluation metrics (rRMSF and TIC-RMWD) across the 30 protein test set for the seven evaluated models (Model C, Model M, Model A, Model 1K, Model 2K, Model 3K, and DynoM)


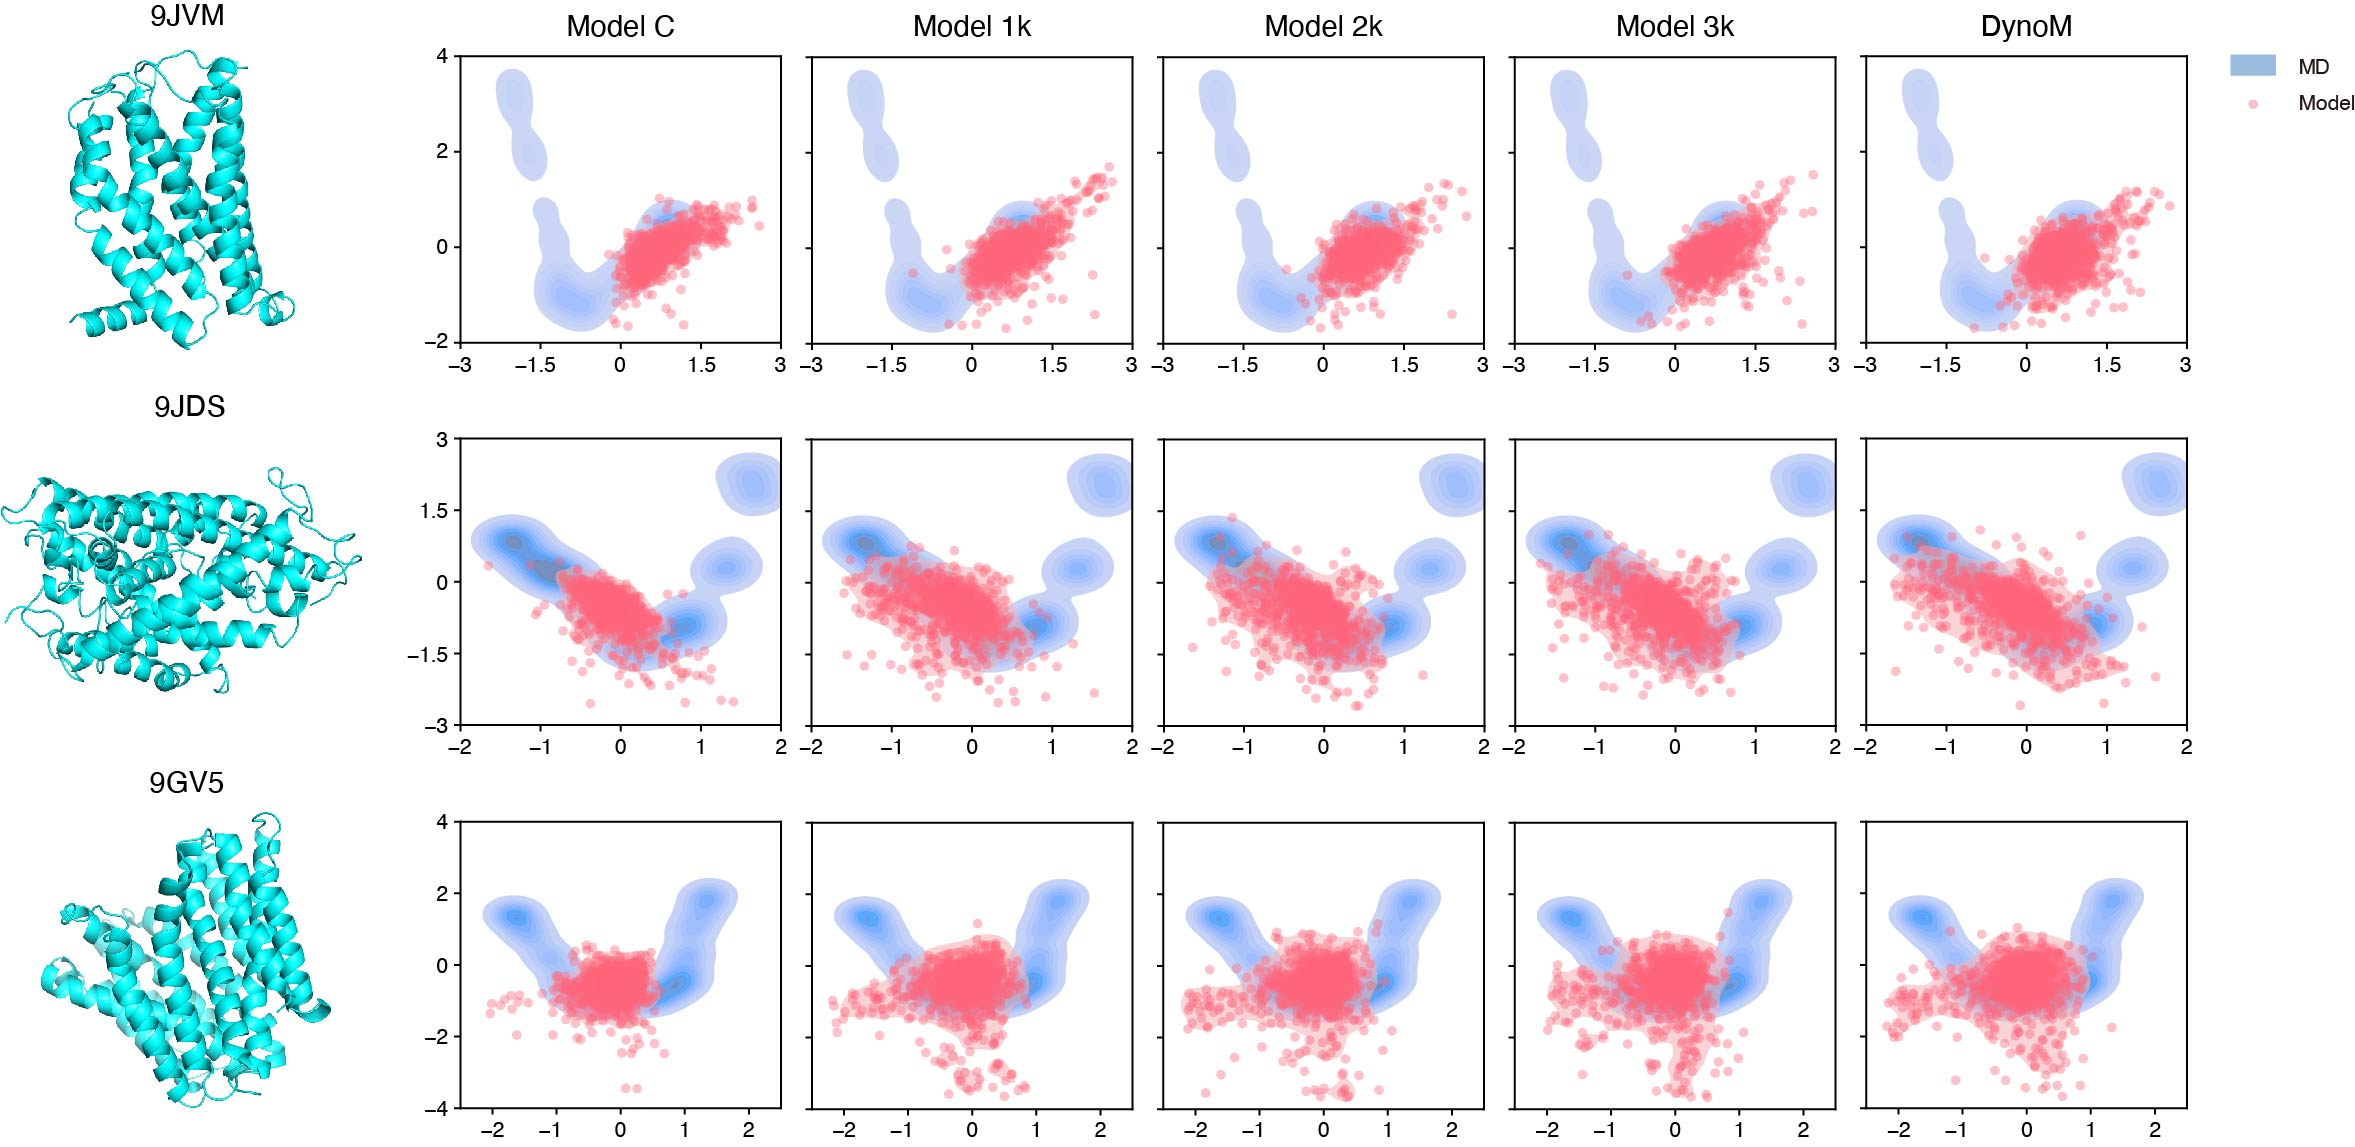


**Supplementary Figure 4.** The conformations generated by MD and models with various amounts of fine-tuning data were projected onto the first two time-lagged independent components for three protein cases (PDB ID: 9JVM, 9JDS and 9GV5). The blue contours represent the reference MD, and the red scatter points and contours represent the predicted conformations.


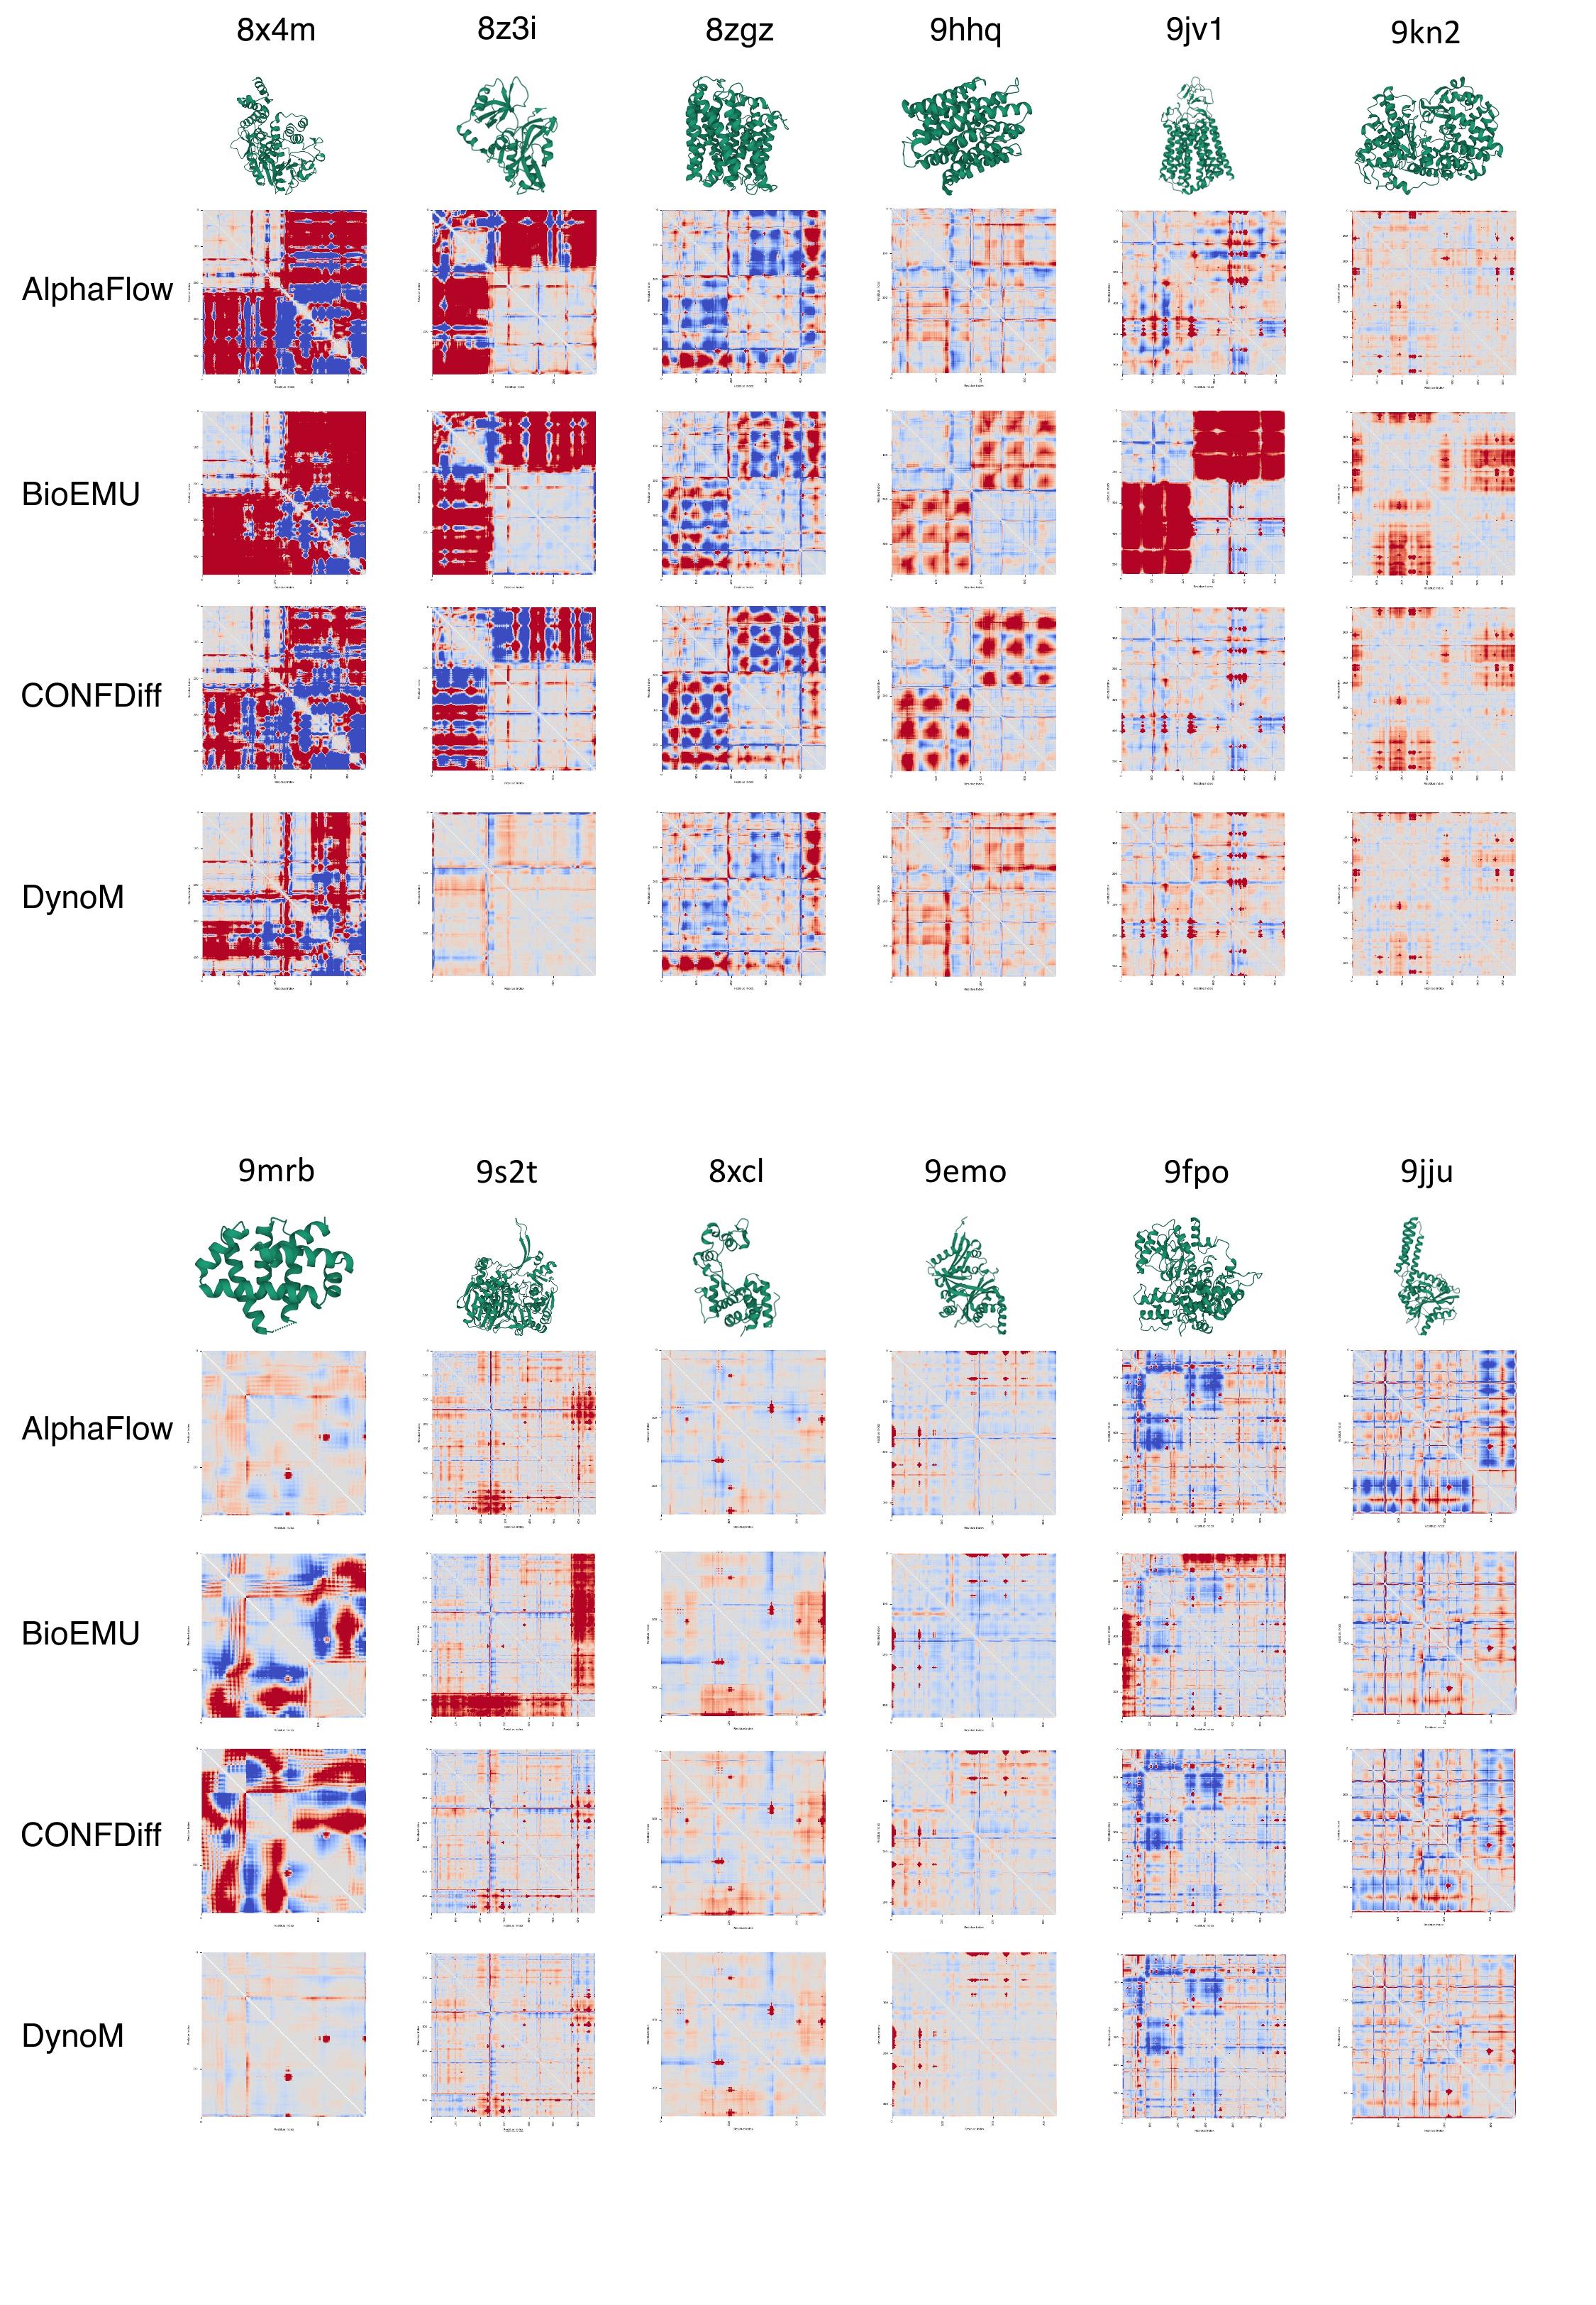


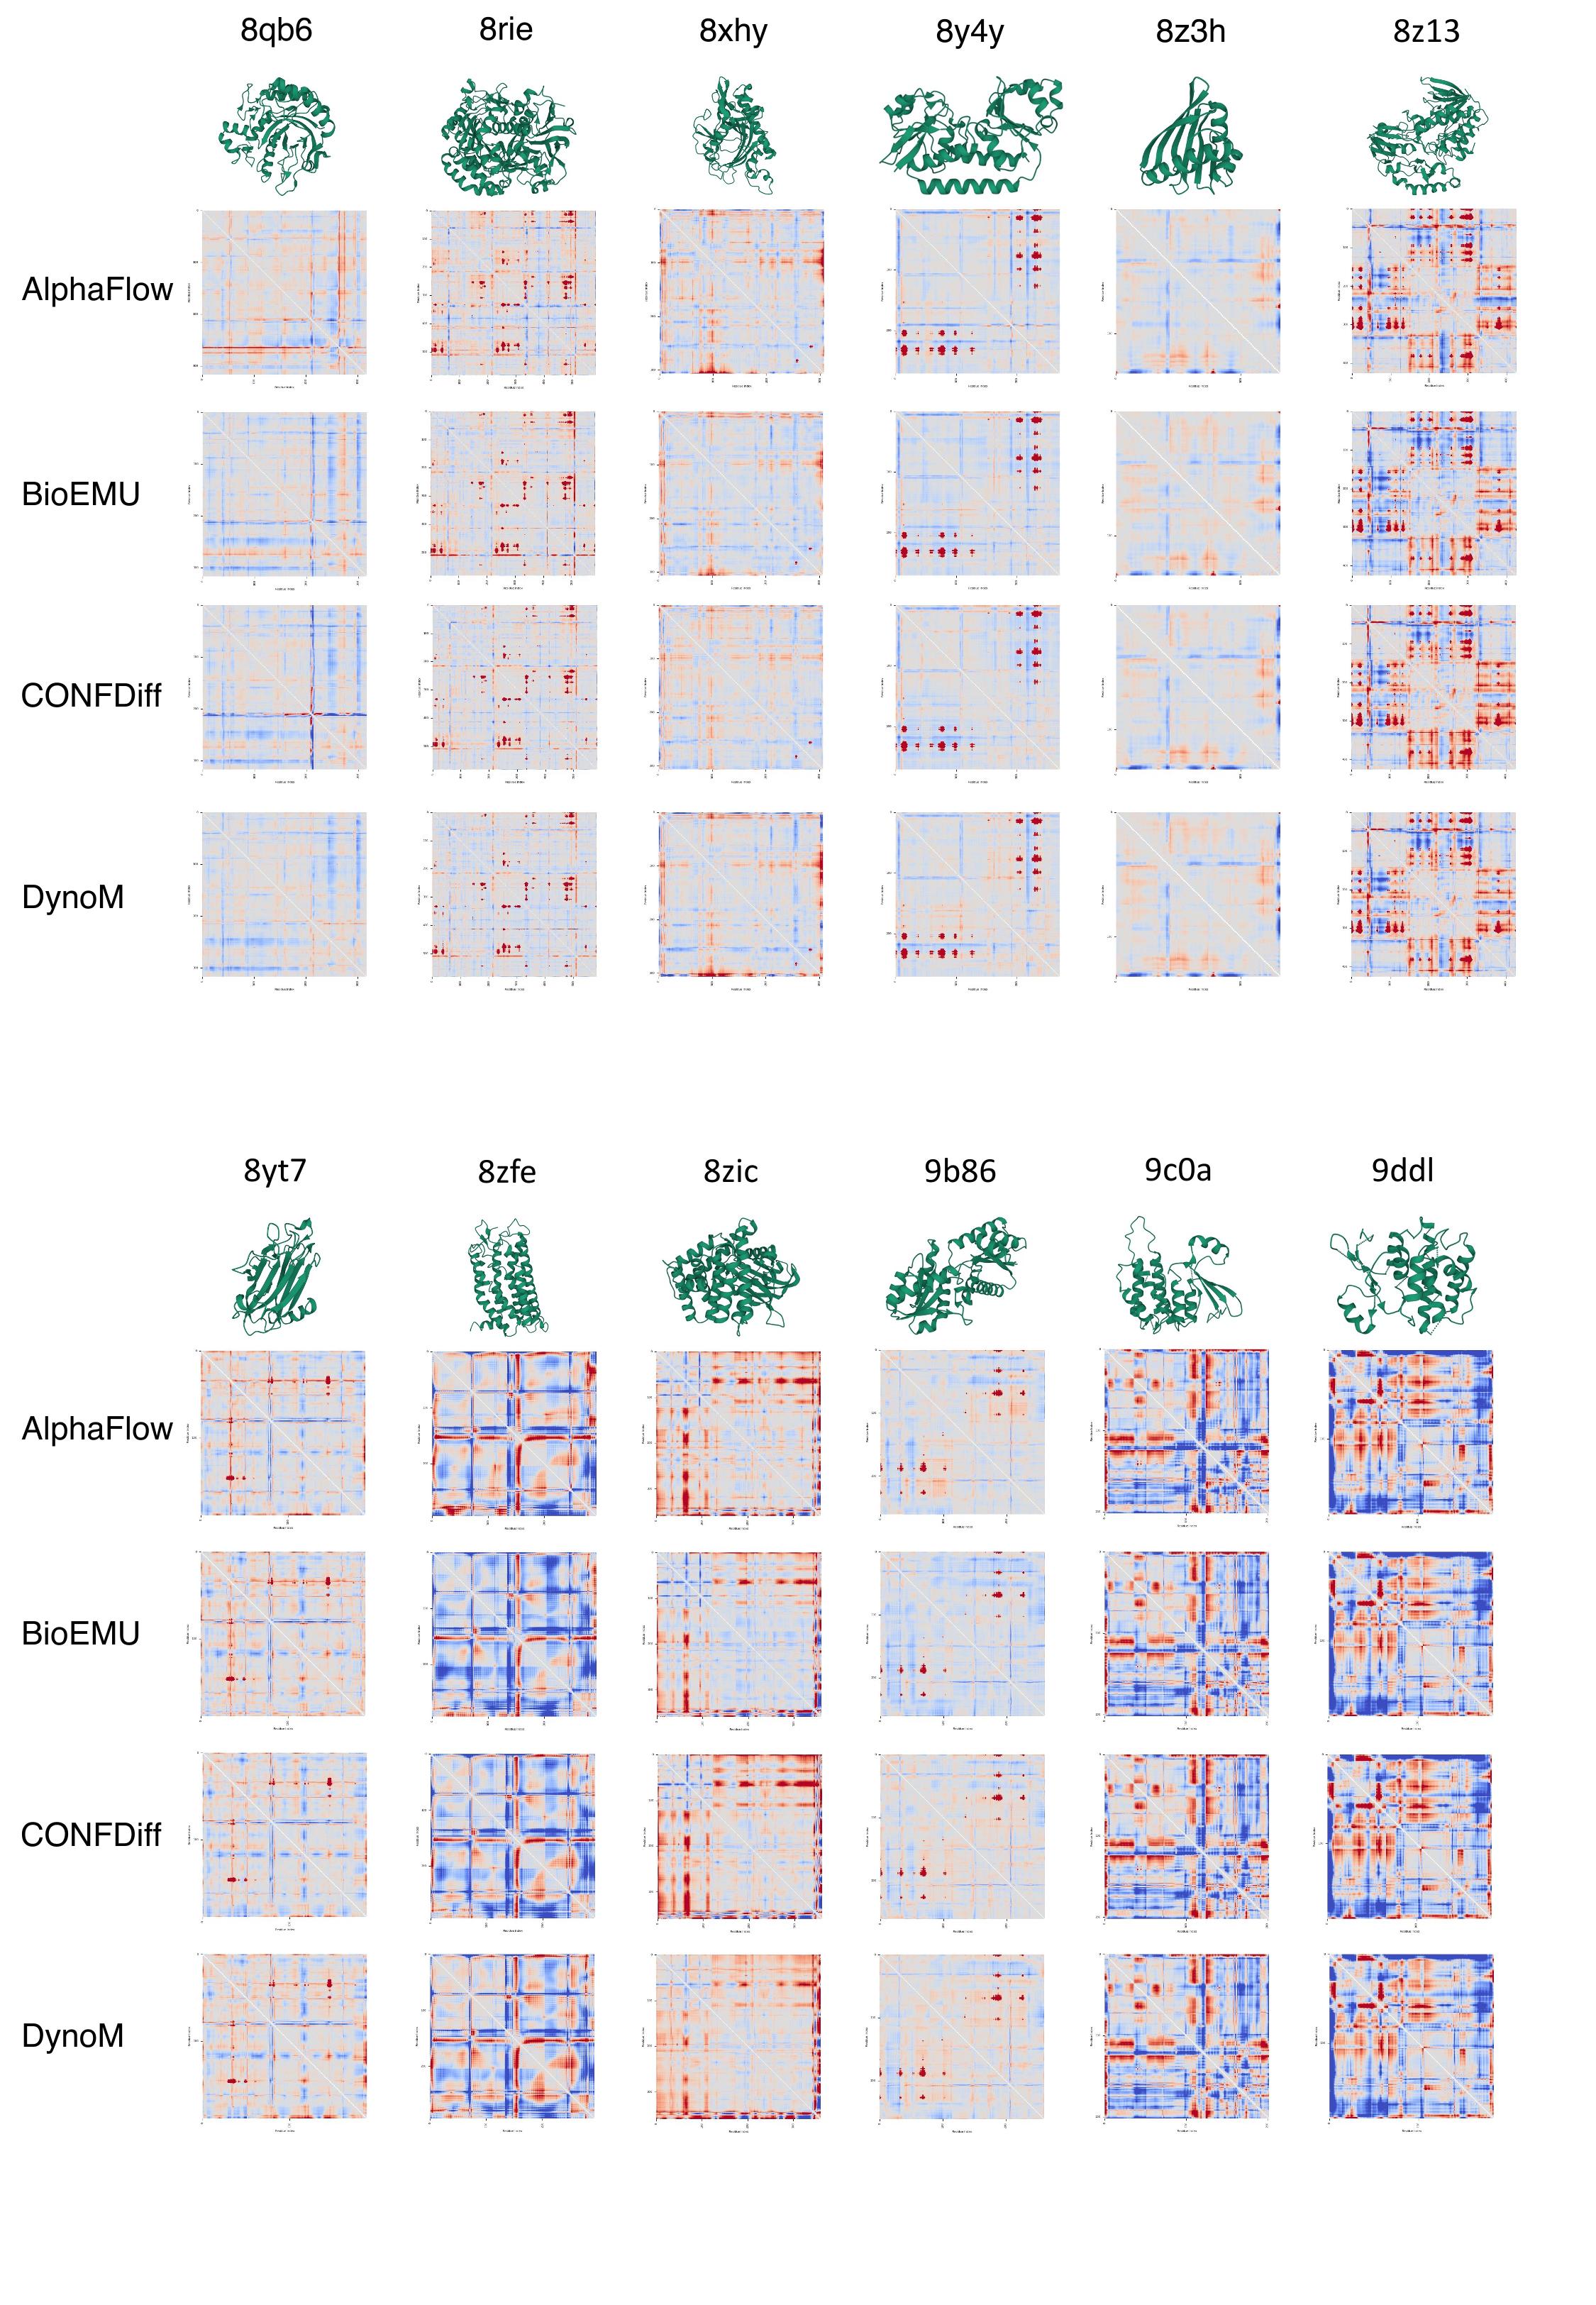


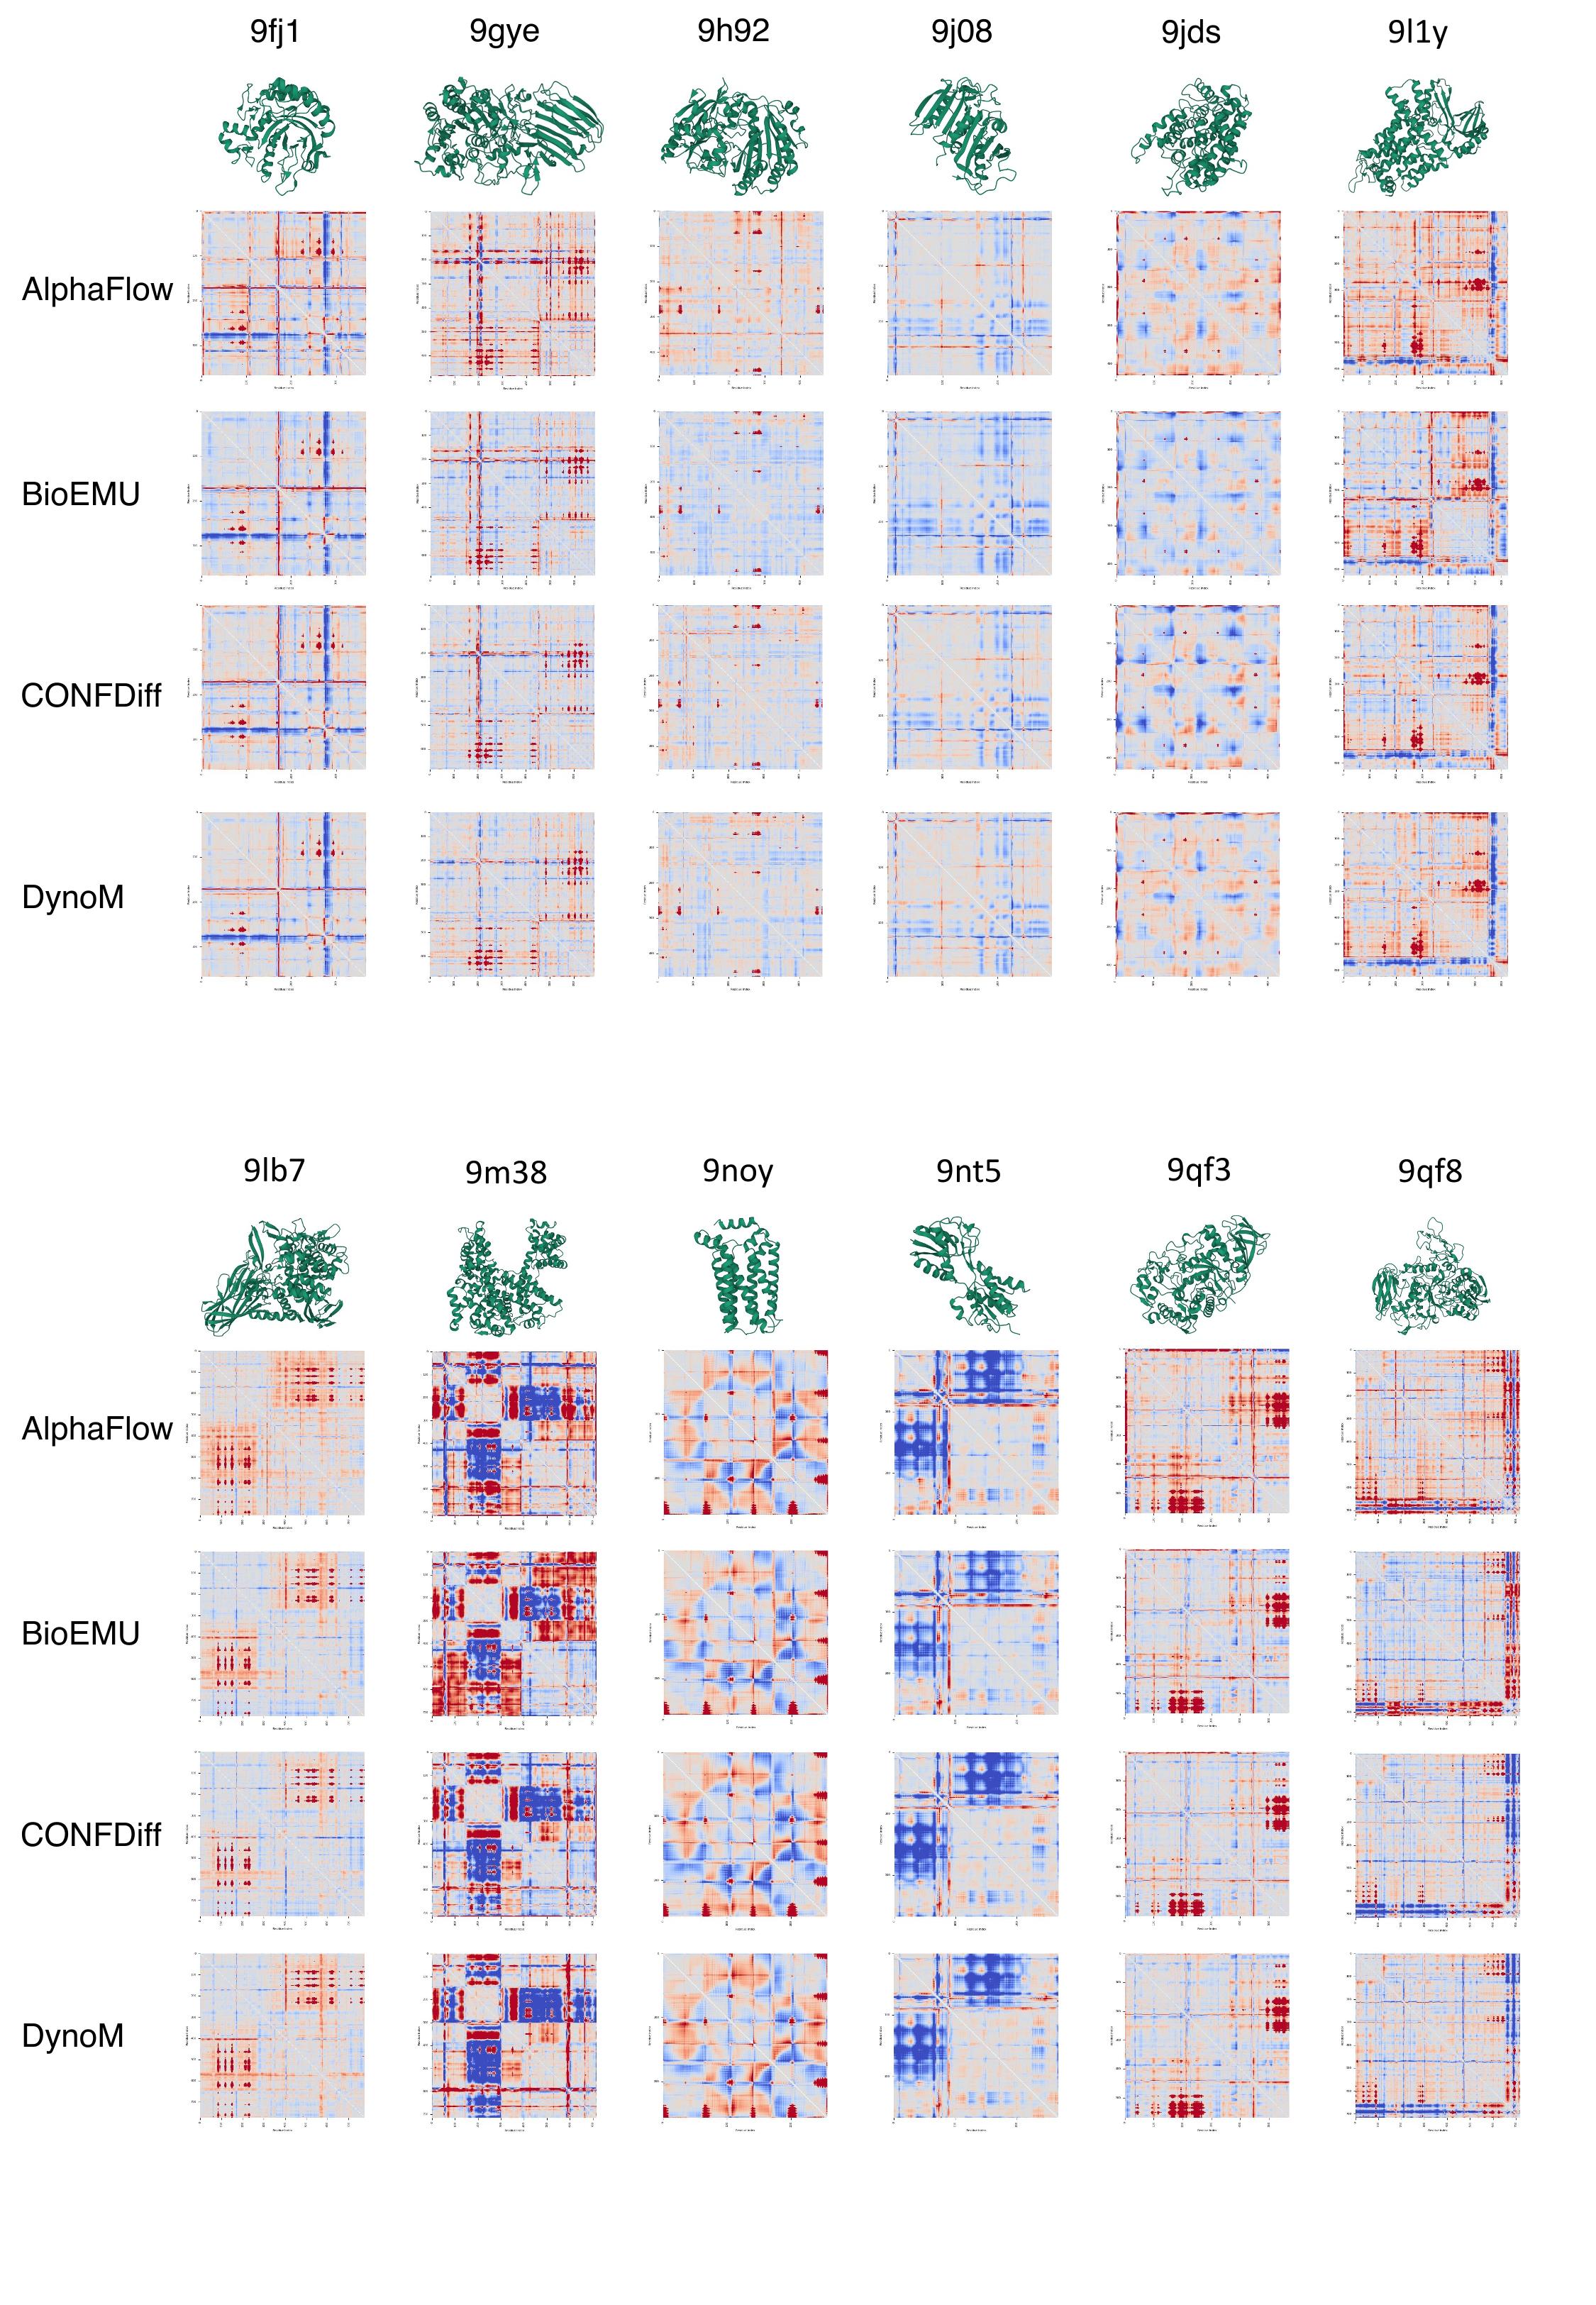


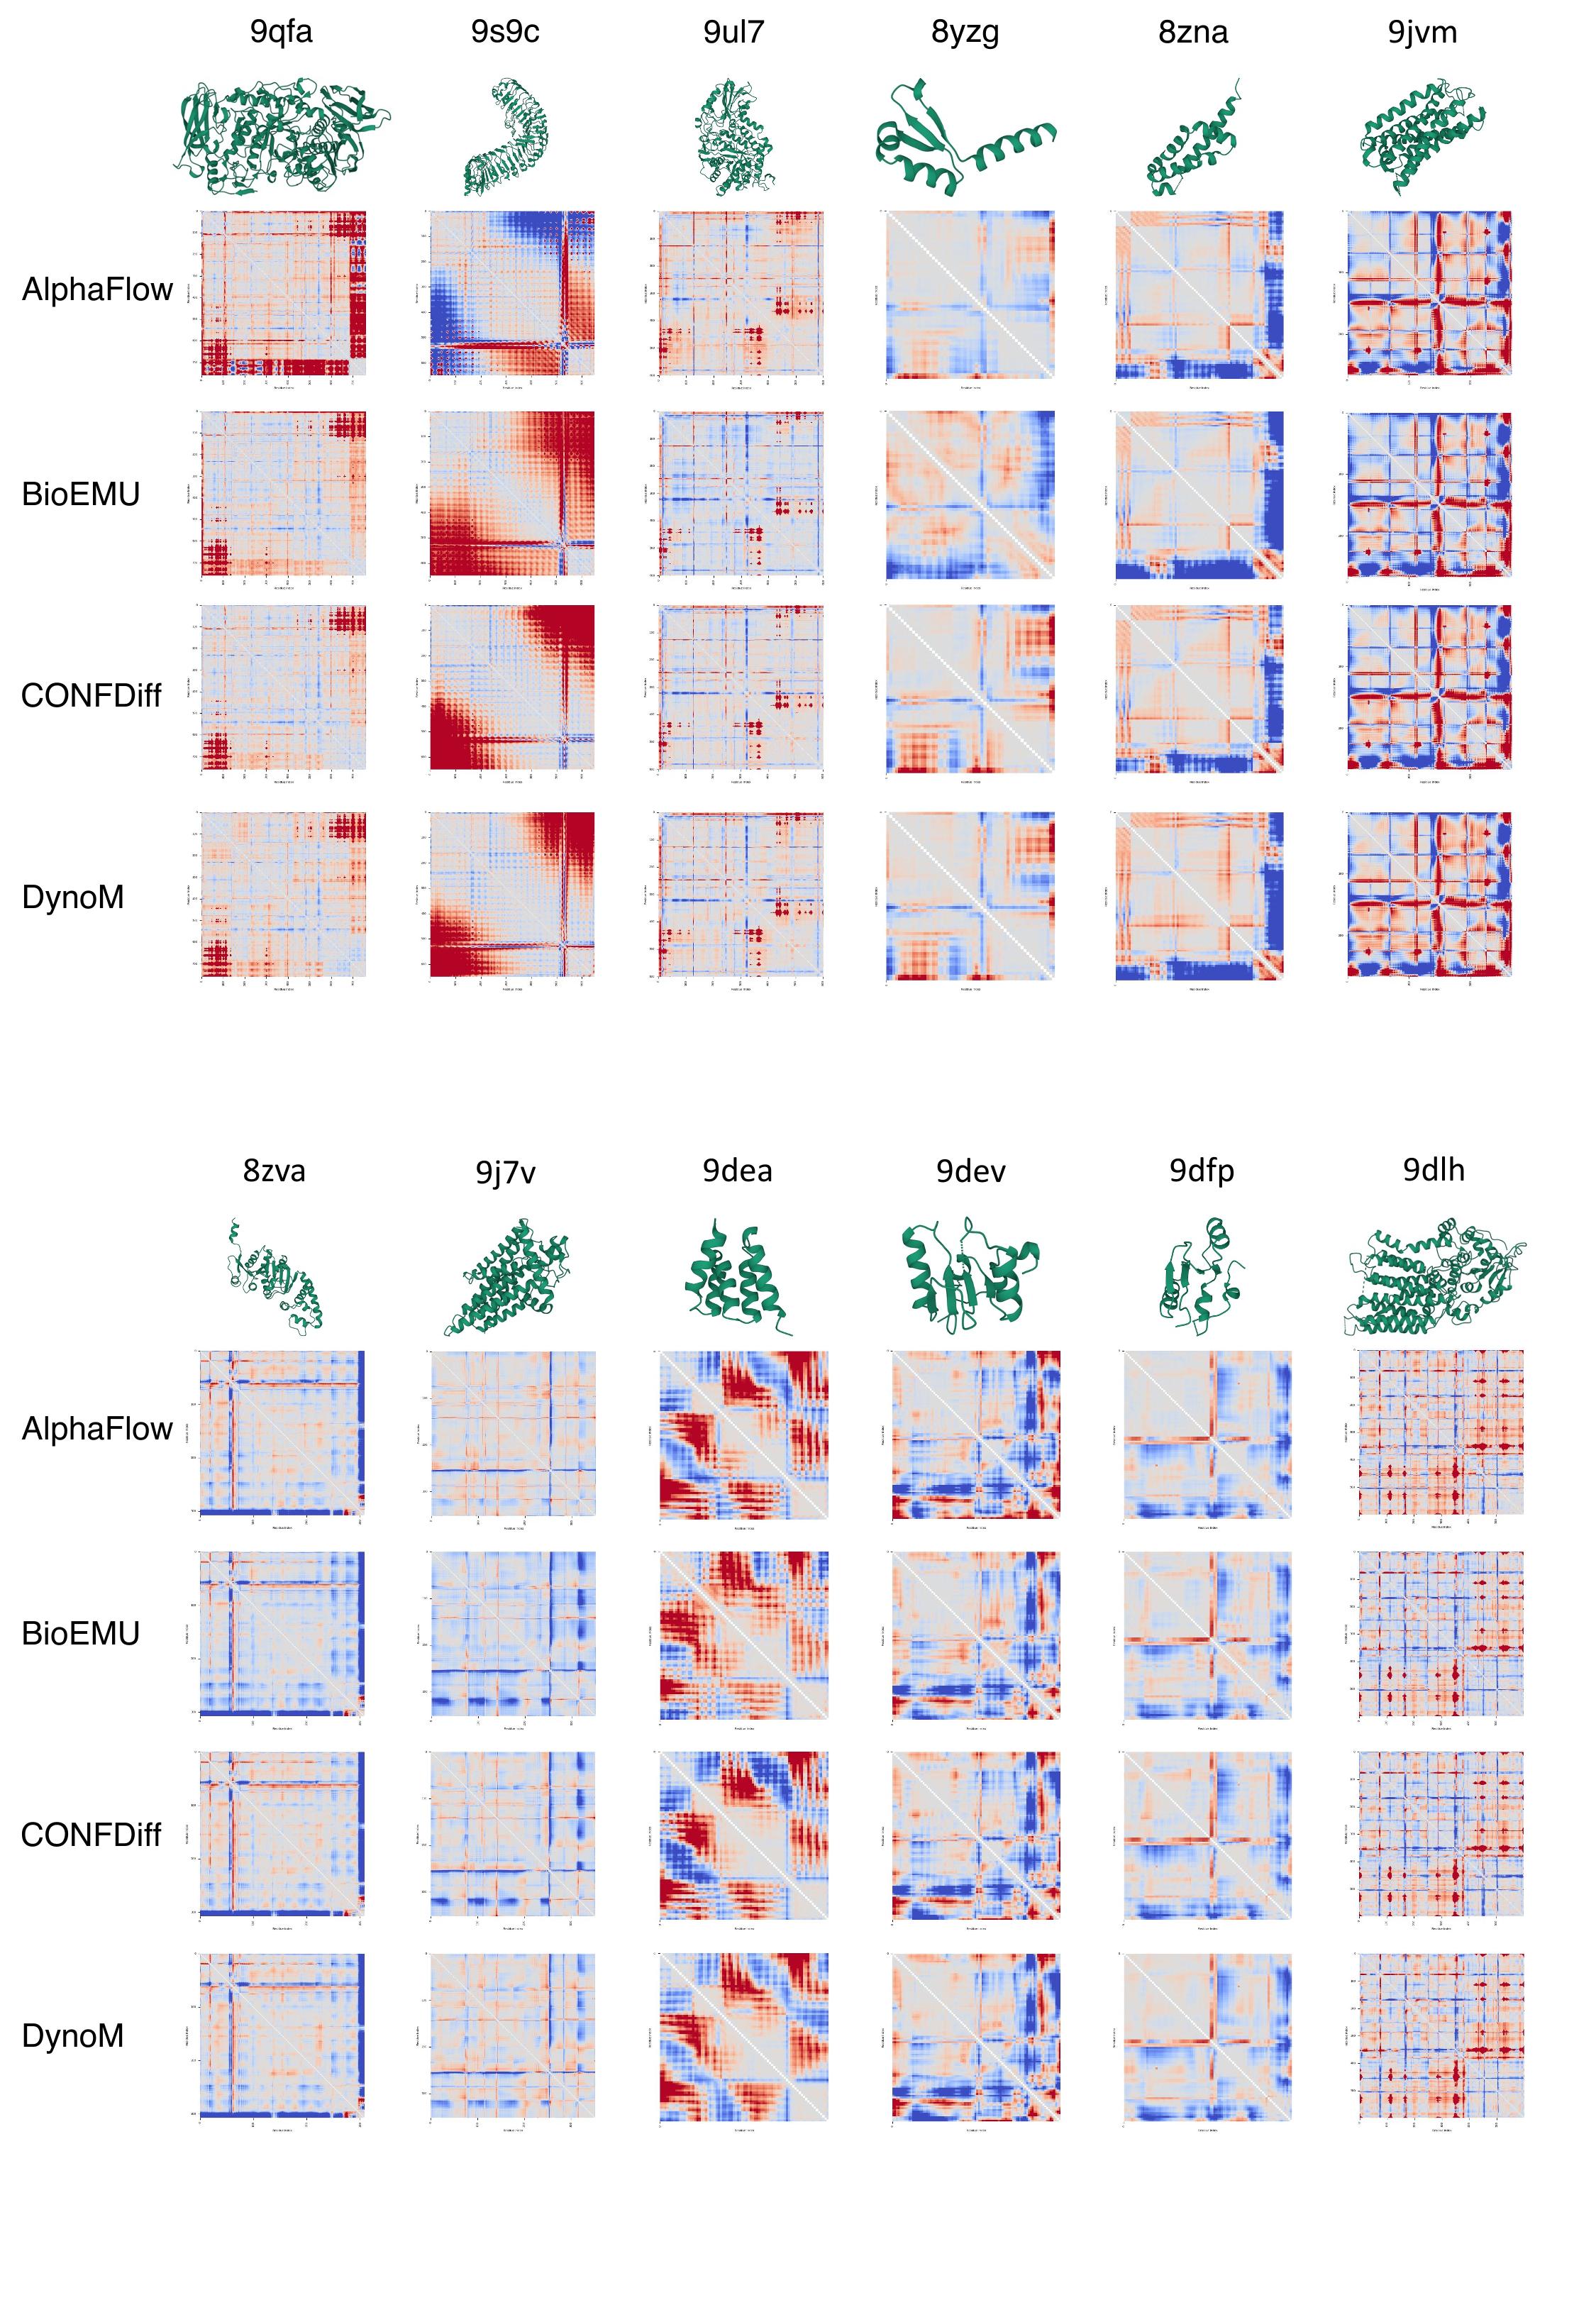


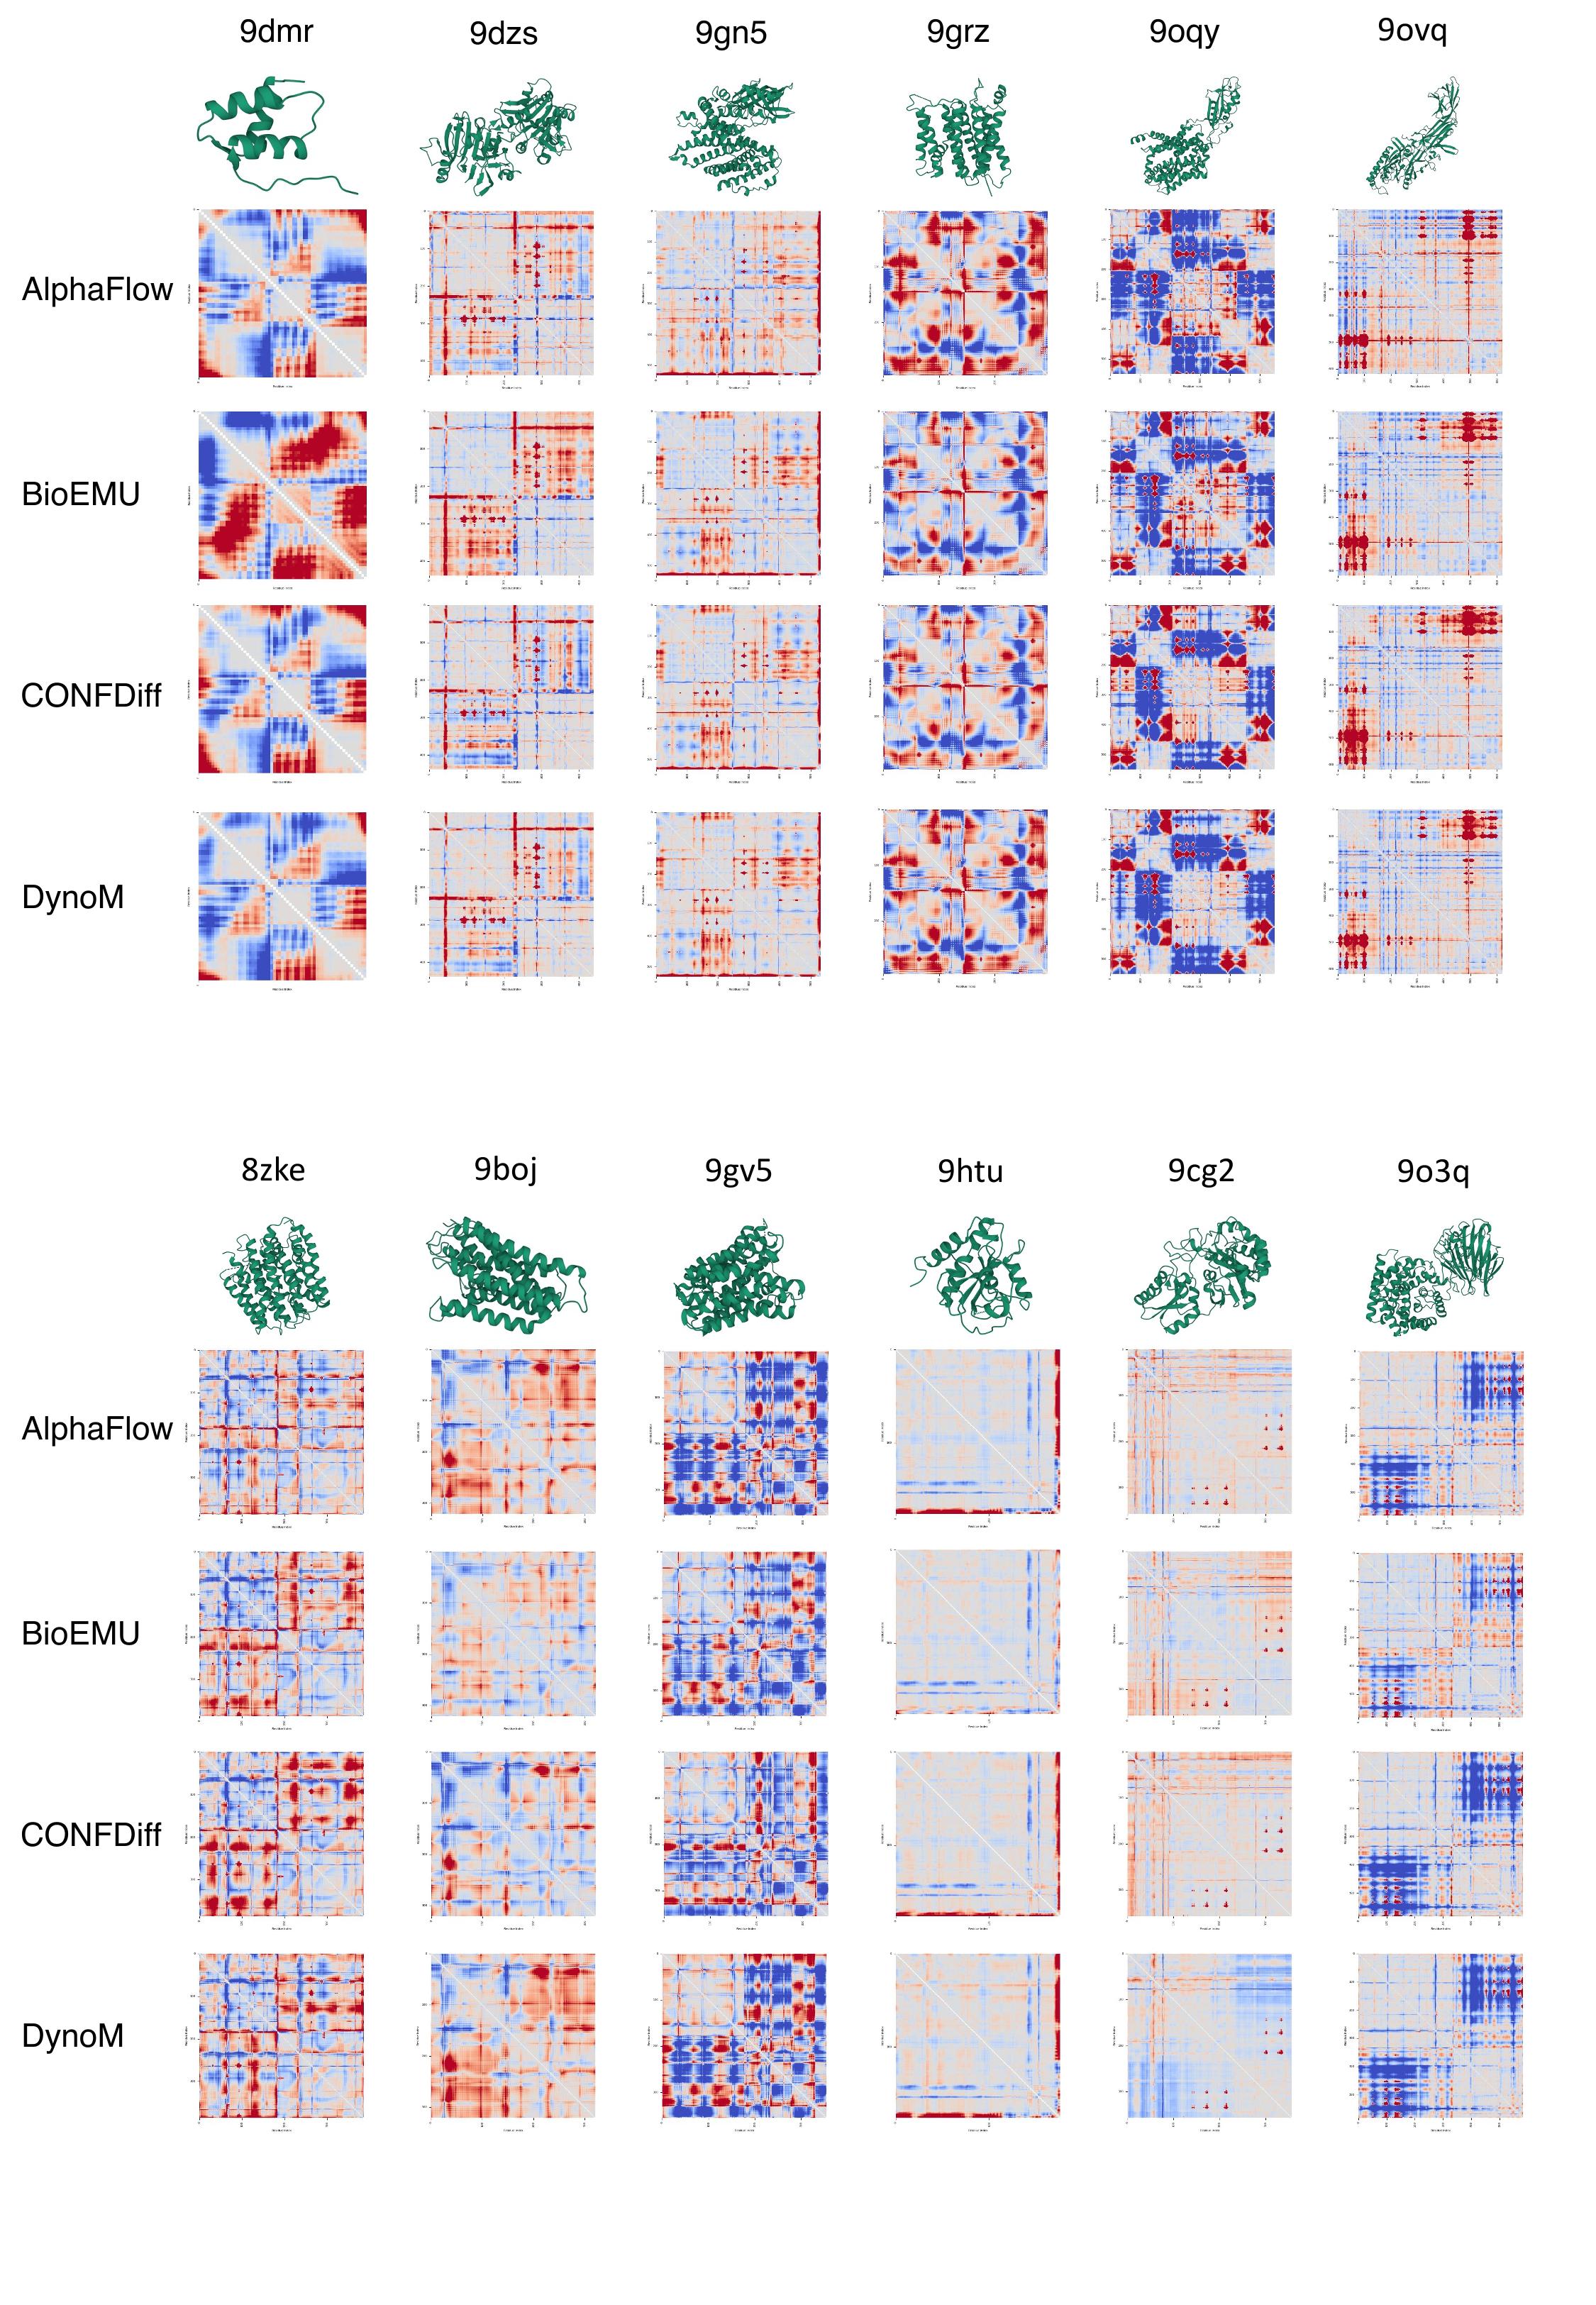


**Supplementary Figure 5.** The results for the remaining 60 proteins in the test set are shown. The 2D heatmap illustrated the residue-to-residue deviation of average pairwise Cα-Cα distances between the predicted and ground-truth MD ensembles. Red indicates that the distance is overestimated, and blue indicates that the distance is underestimated.


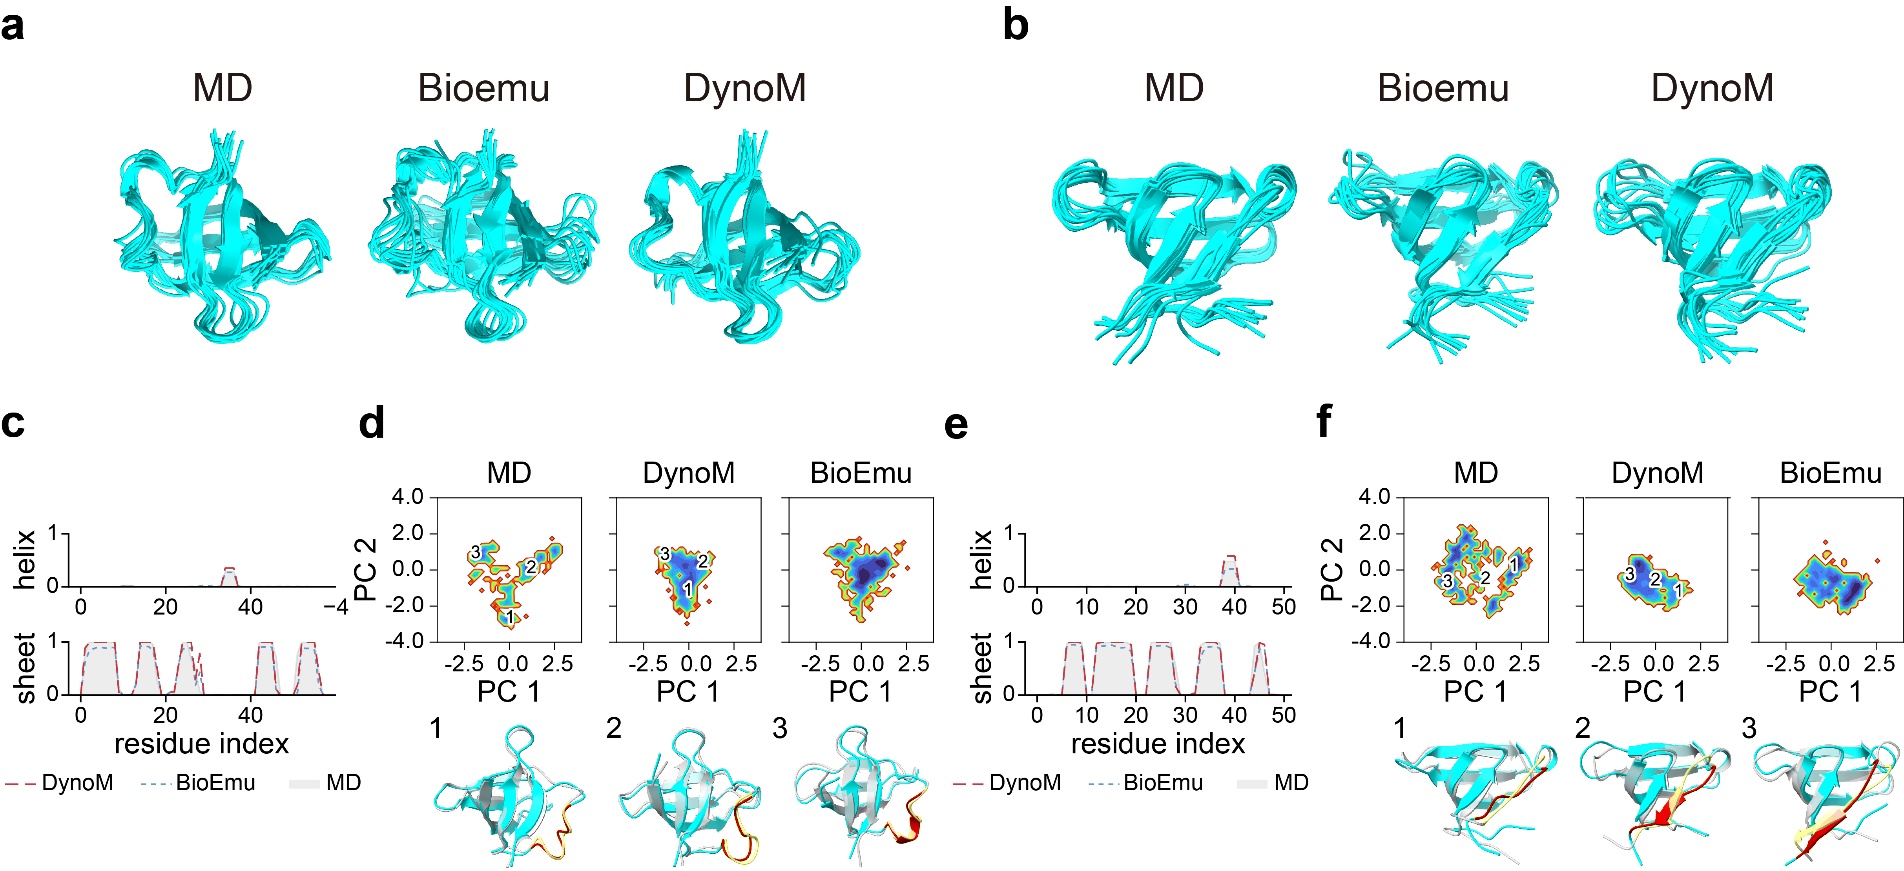


**Supplementary Figure 6**. **a-b,** Conformation ensembles generated by MD, BioEmu, and DynoM on the two protein cases (PDB ID: 2WG5F and 3UDCA) with local structural changes. **c&e,** Frequency distribution of secondary structures (-helix and -sheet) for each residue in a set of 1000 conformations generated by the reference MD (gray), BioEmu(blue curve), and DynoM (red curve), separately. **d&f,** Free energy surfaces (in kcal/mol) of ground truth MD, DynoM, and BioEmu in the space of the first two principal components. Three representative conformations were selected and labeled as 1-3. Gray and yellow represent the conformations of MD; light blue and red represent the conformations generated by DynoM.


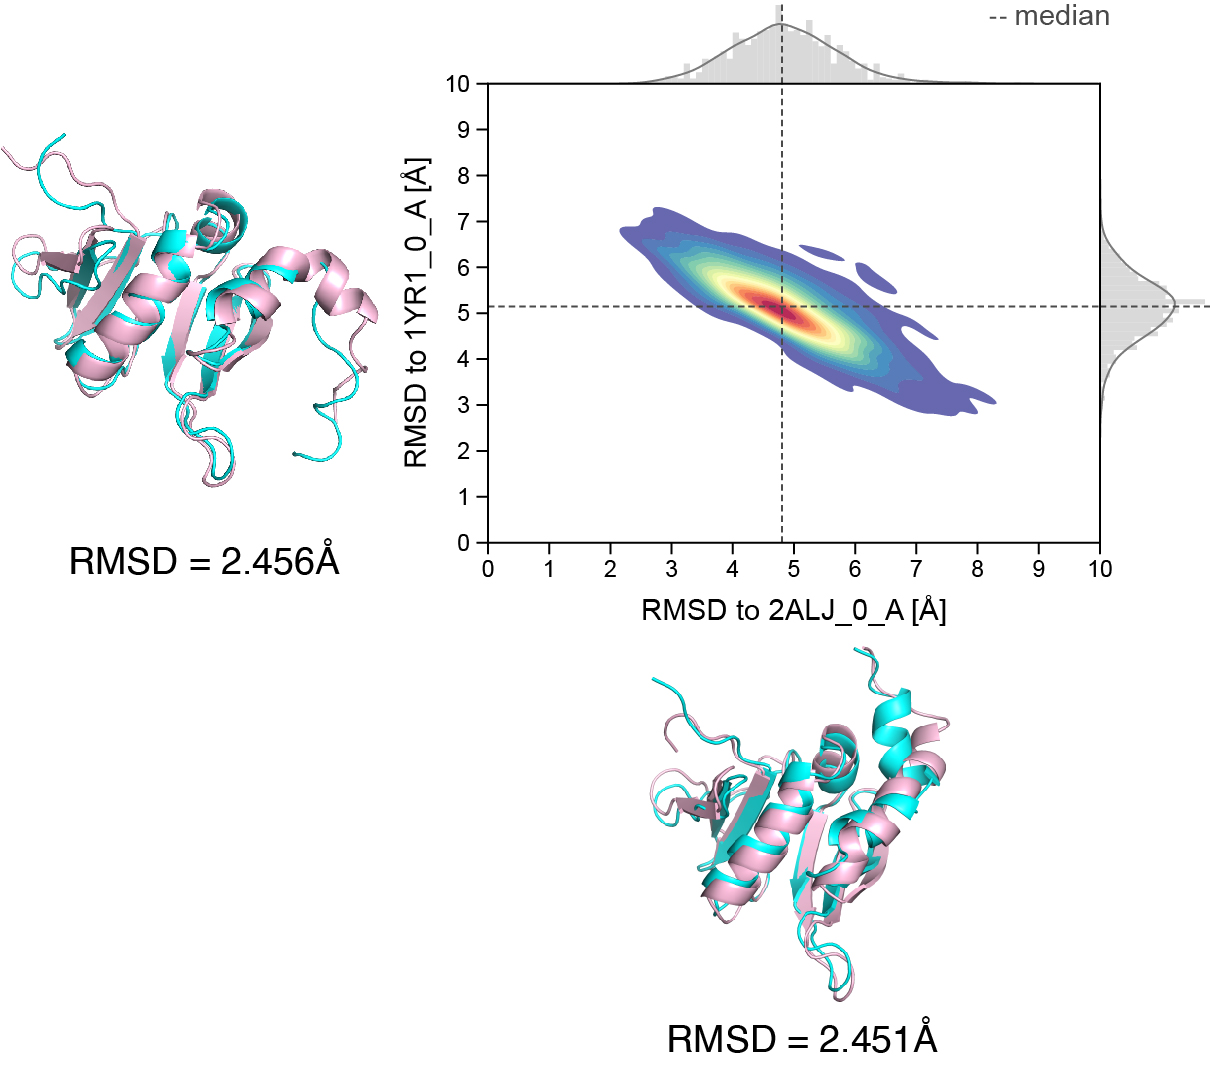


**Supplementary Figure 7.** Performance of DynoM in sampling local structural conformational changes (PDB ID: 2ALJ and 1YR1). The density 2D plots illustrate the distribution of the generated ensemble relative to two distinct reference structures (RMSD on x- and y-axes).


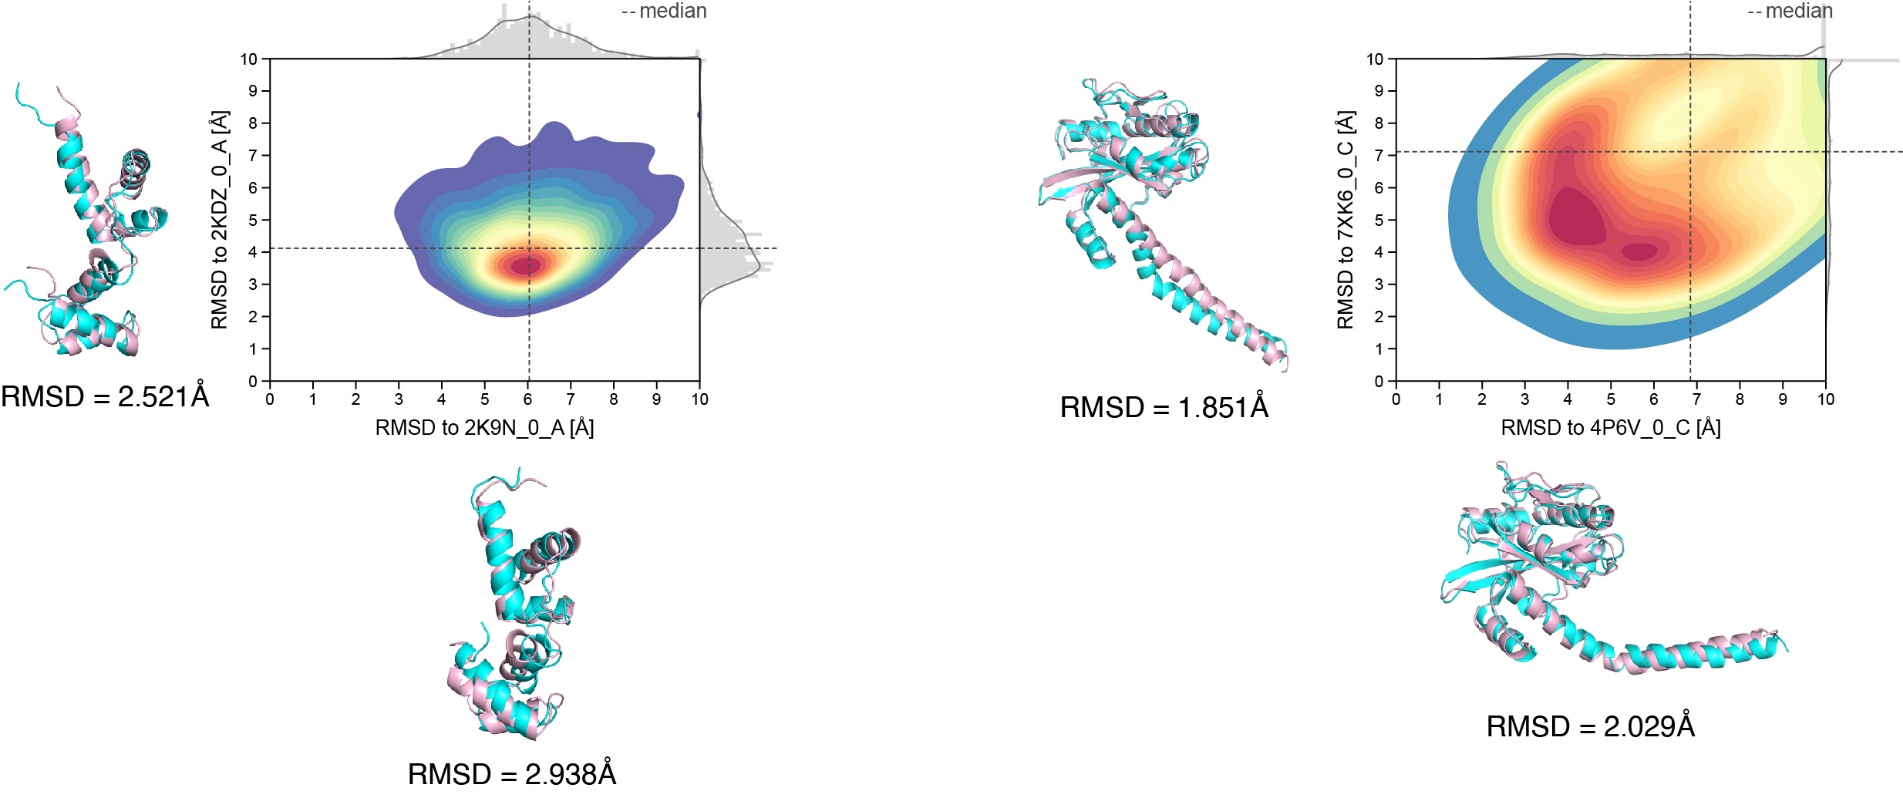


**Supplementary Figure 8.** Performance of DynoM in sampling apo-holo conformational transitions(PDB ID: 2K9N and 2KDZ, 4P6V and 7XK6). The density 2D plots illustrate the distribution of the generated ensemble relative to two distinct reference structures (RMSD on x- and y-axes).


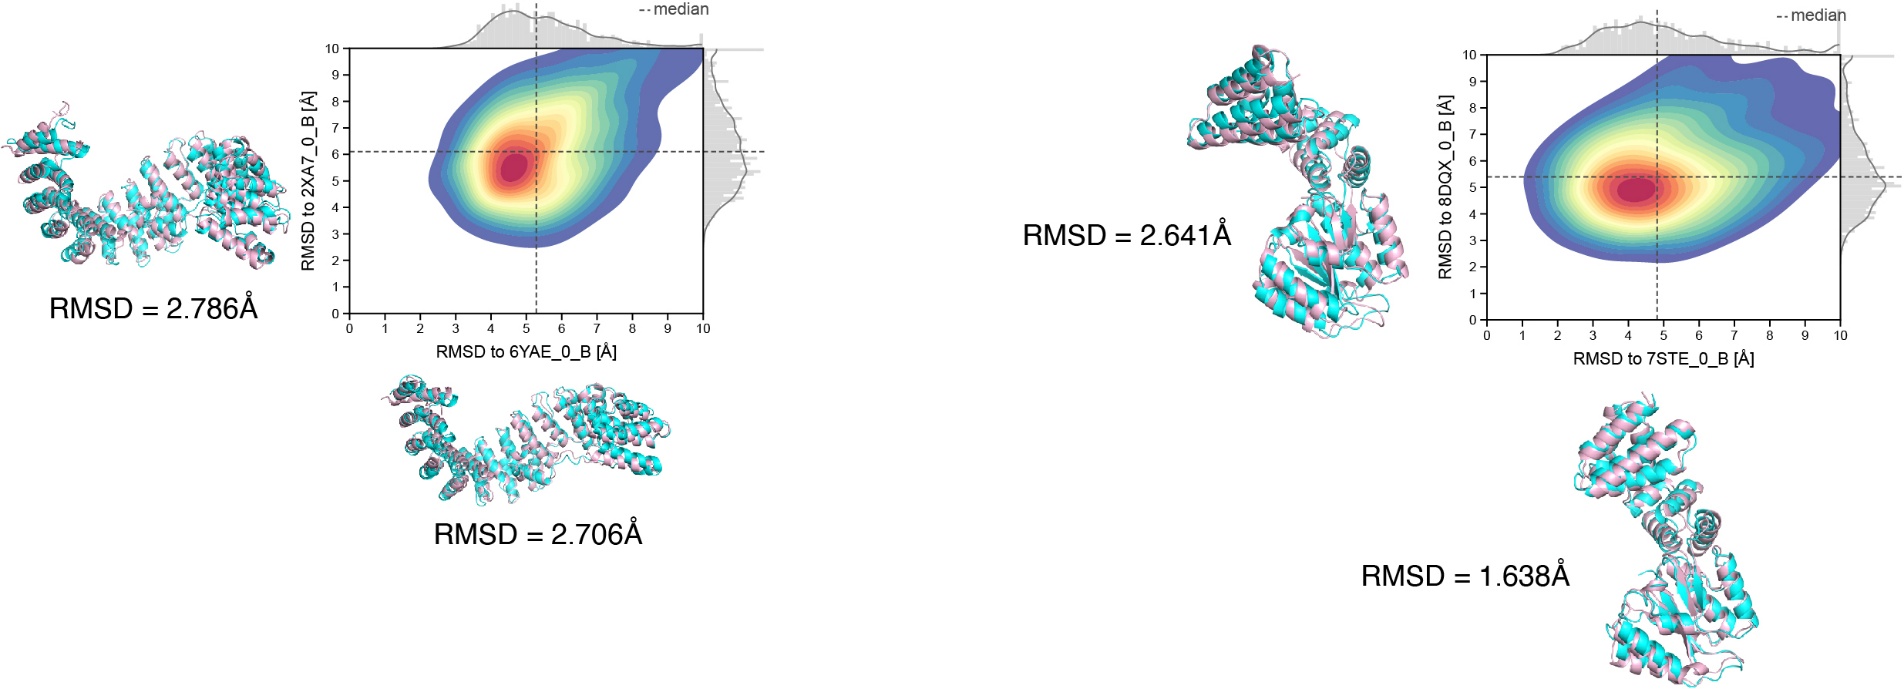


**Supplementary Figure 9.** Performance of DynoM in sampling rigid-body domain conformational motions (PDB ID: 6YAE and 2XA7, 7STE and 8DQX). The density 2D plots illustrate the distribution of the generated ensemble relative to two distinct reference structures (RMSD on x- and y-axes).


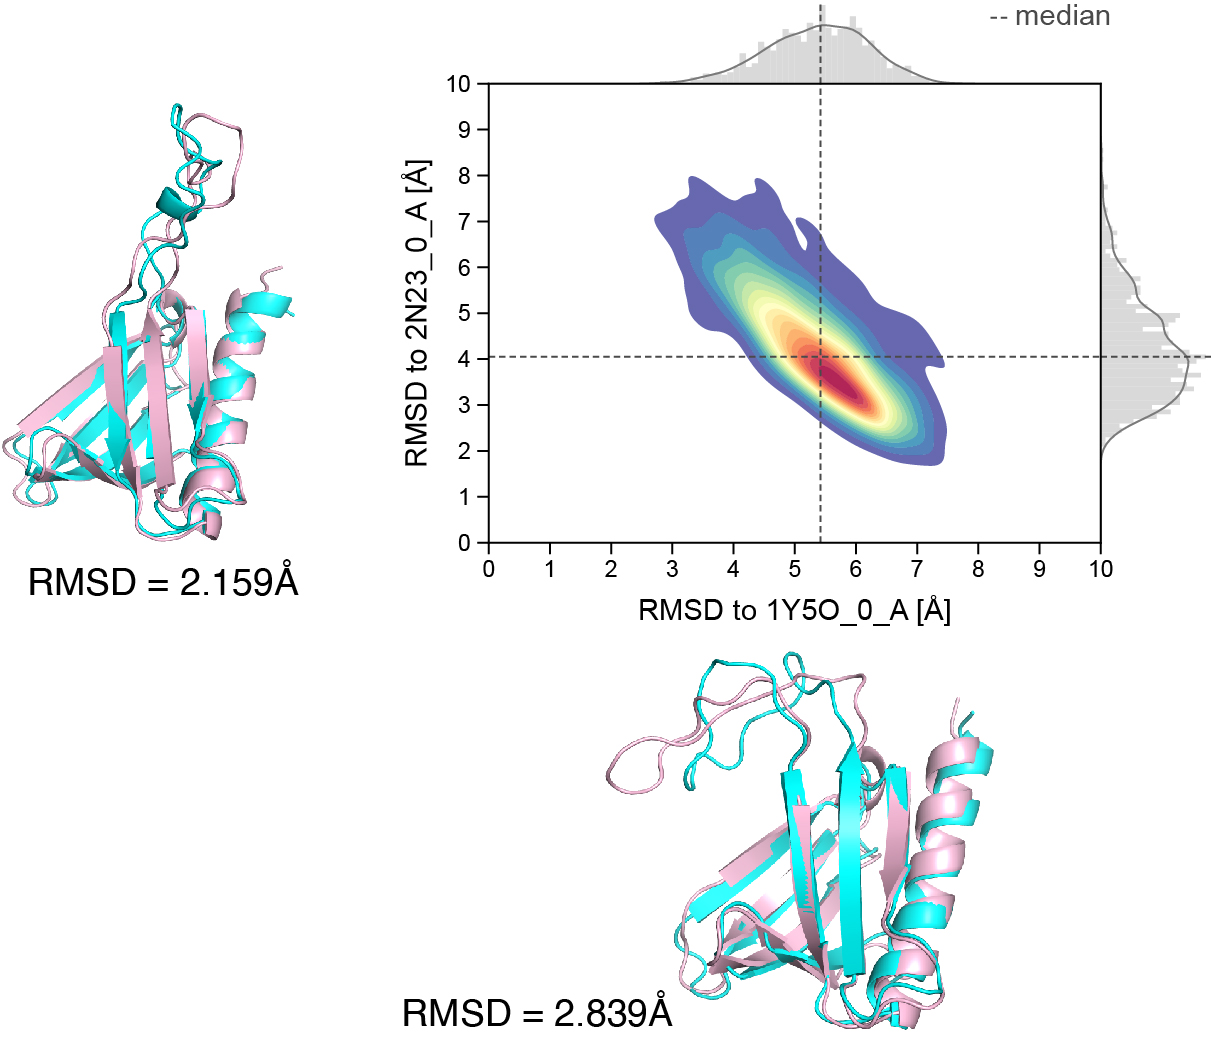


**Supplementary Figure 10.** Performance of DynoM in sampling folding-unfolding conformational transitions(PDB ID: 1Y5O and 2N23). The density 2D plots illustrate the distribution of the generated ensemble relative to two distinct reference structures (RMSD on x- and y-axes).


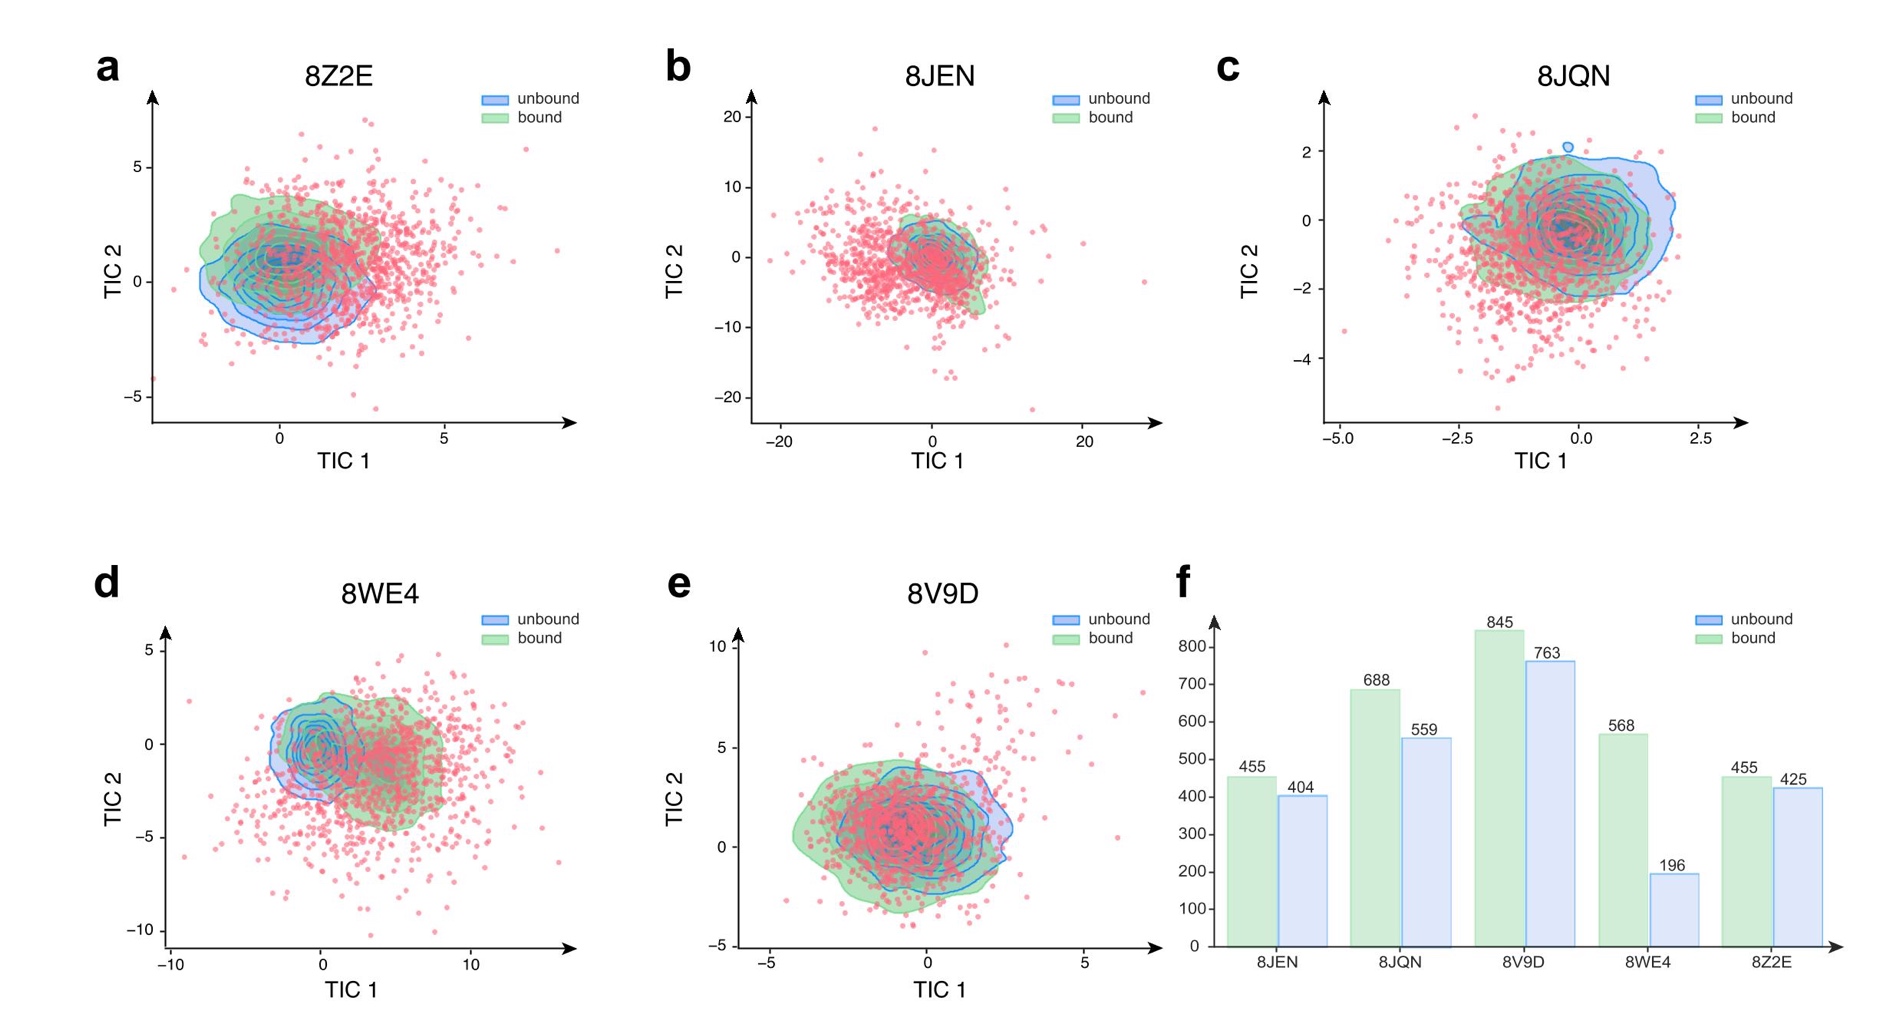


**Supplementary Figure 11. a-e.** The conformational landscape of five antibody-antigen complexes in TICA space. Each subplot shows the dimensionality reduction result of a specific complex (PDB ID: 8Z2E, 8JEN, 8JQN, 8WE4, 8V9D) based on the backbone dihedral angles (lag time = 900). The blue and green regions represent the conformational distribution density of the antigen in unbound and bound states, respectively, simulated by MD over 100 ns; the red scatter plots represent 1,000 conformations of the antigen predicted by DynoM. **f.** Number of the generated conformations falling within the bound and unbound MD regions in the TICA conformational space.


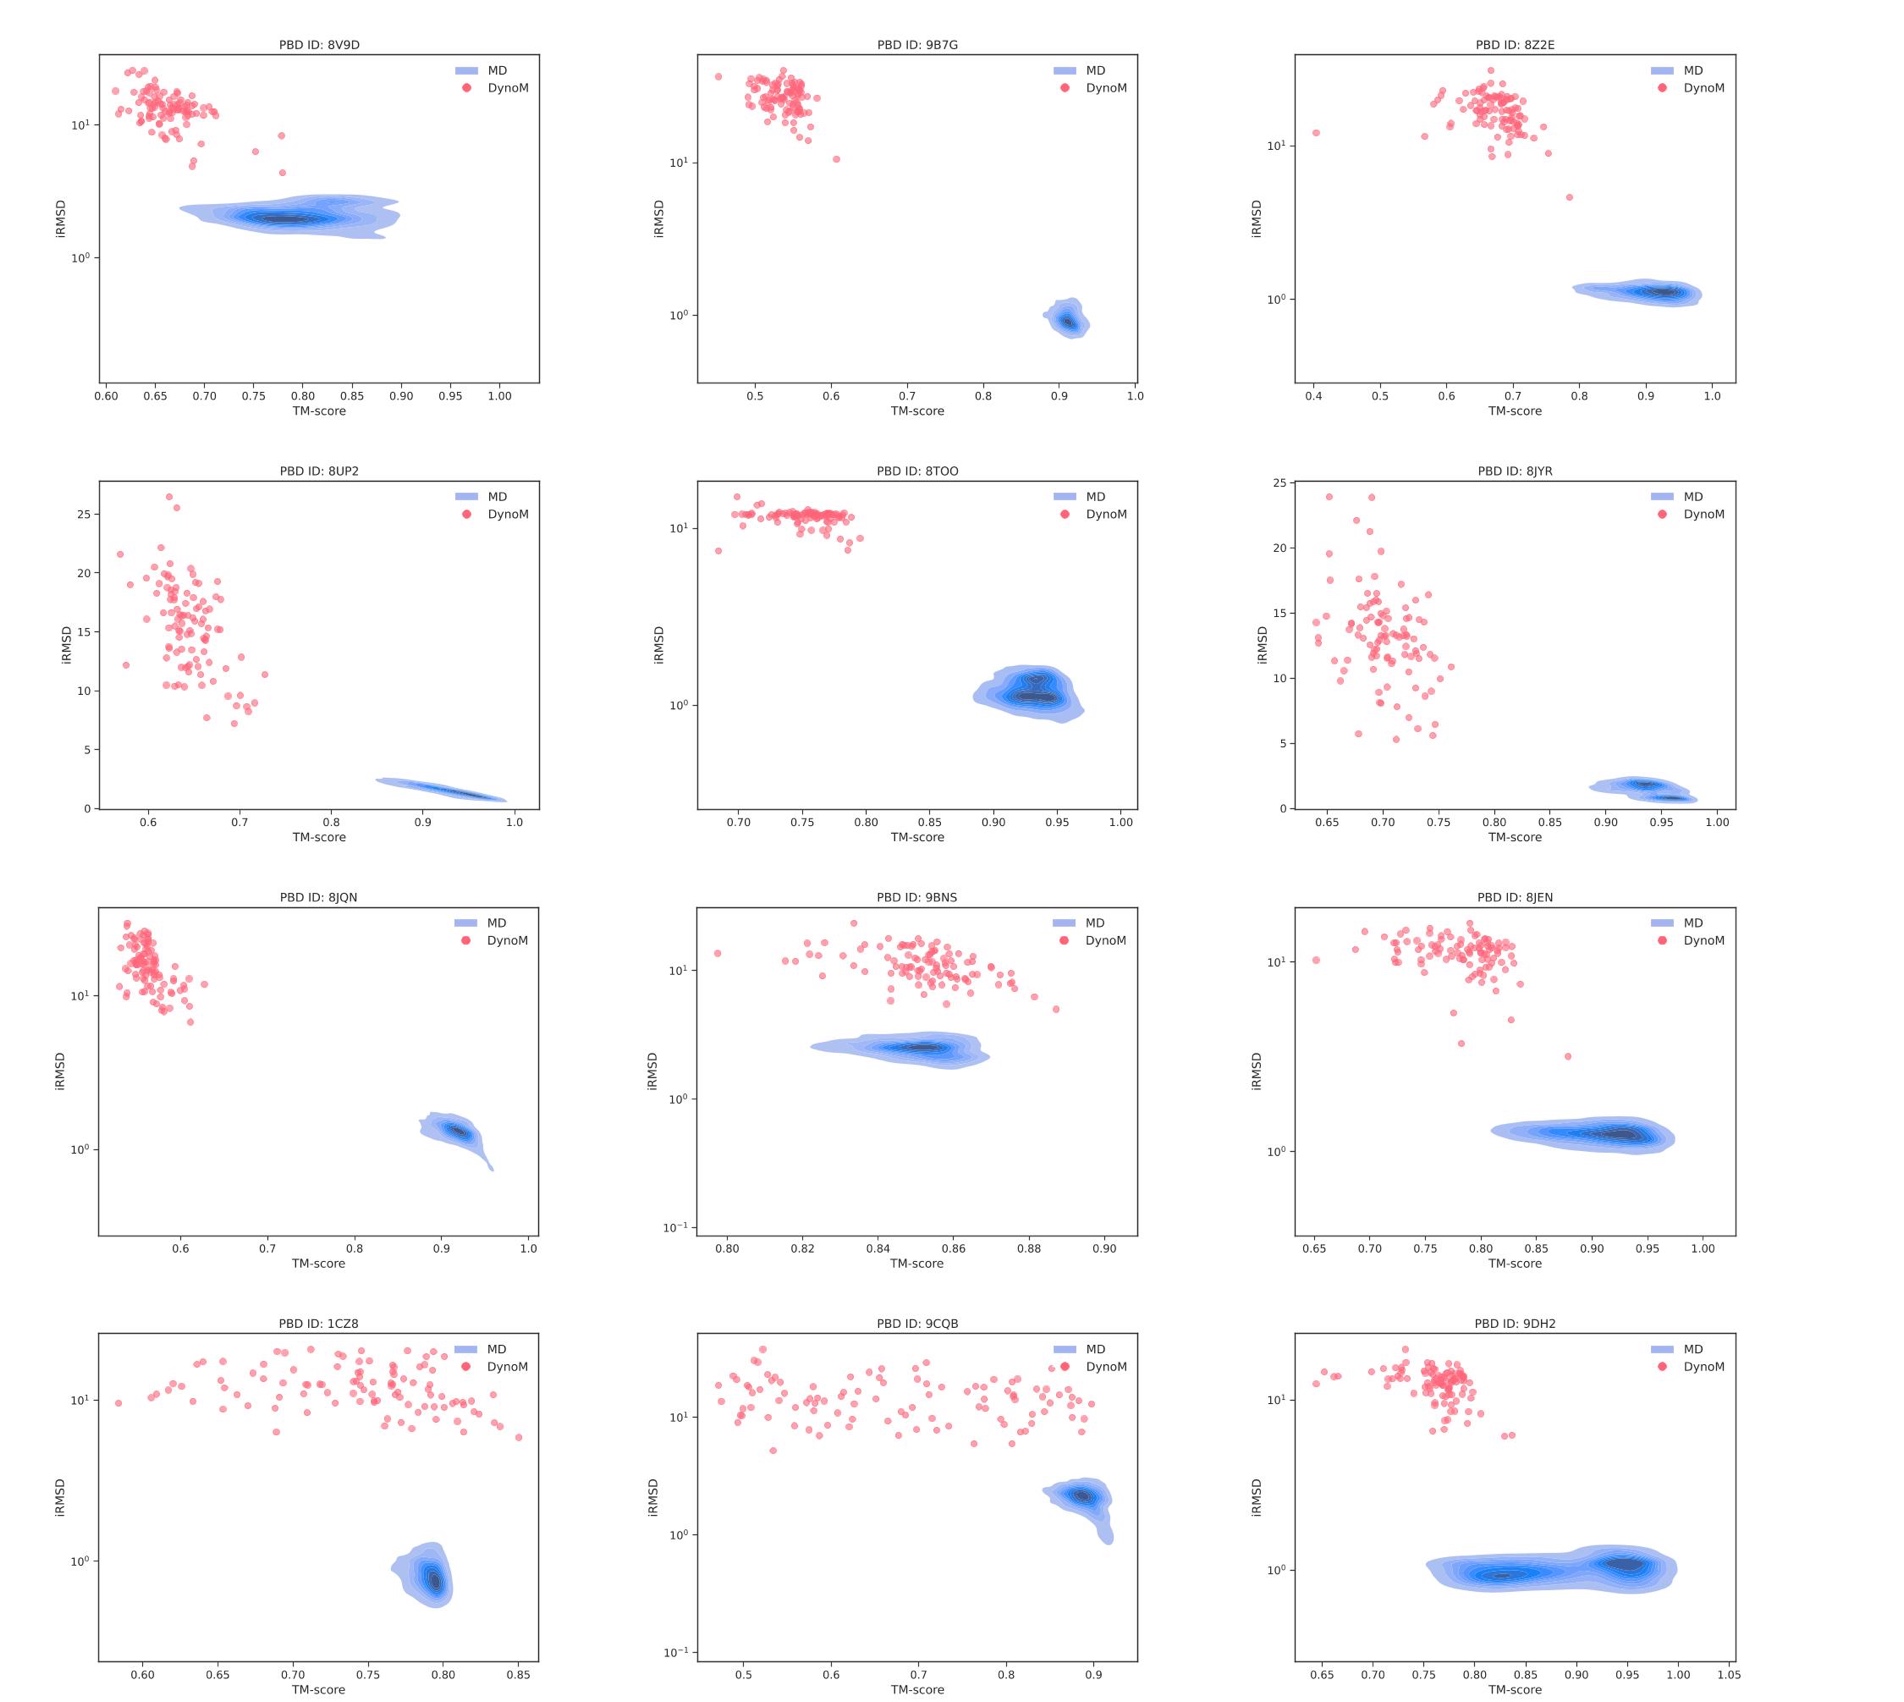


**Supplementary Figure 12.** Comparing the predicted ensembles of DynoM and the reference MD and their TM score-iRMSD distributions (PDB ID: 8V9D, 9B7G, 8Z2E, 8UP2, 8TOO, 8JYR, 8JQN, 9BNS, 8JEN, 1CZ8, 9CQB, 9DH2).


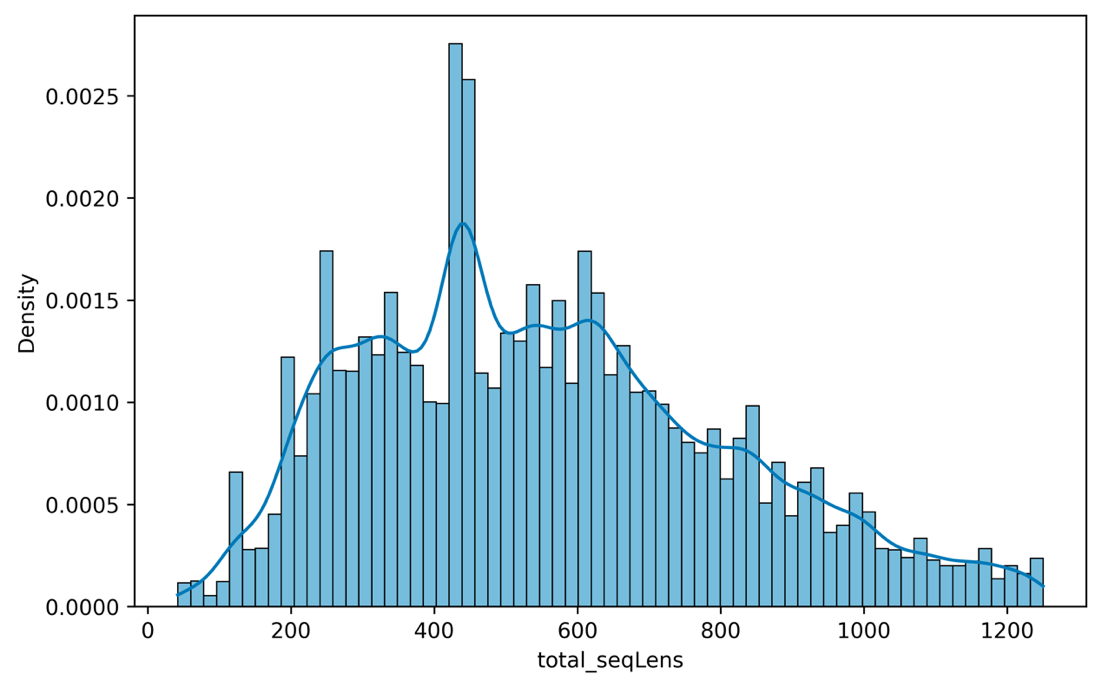


**Supplementary Figure 13.** Histogram of protein length distribution in the complex training set.


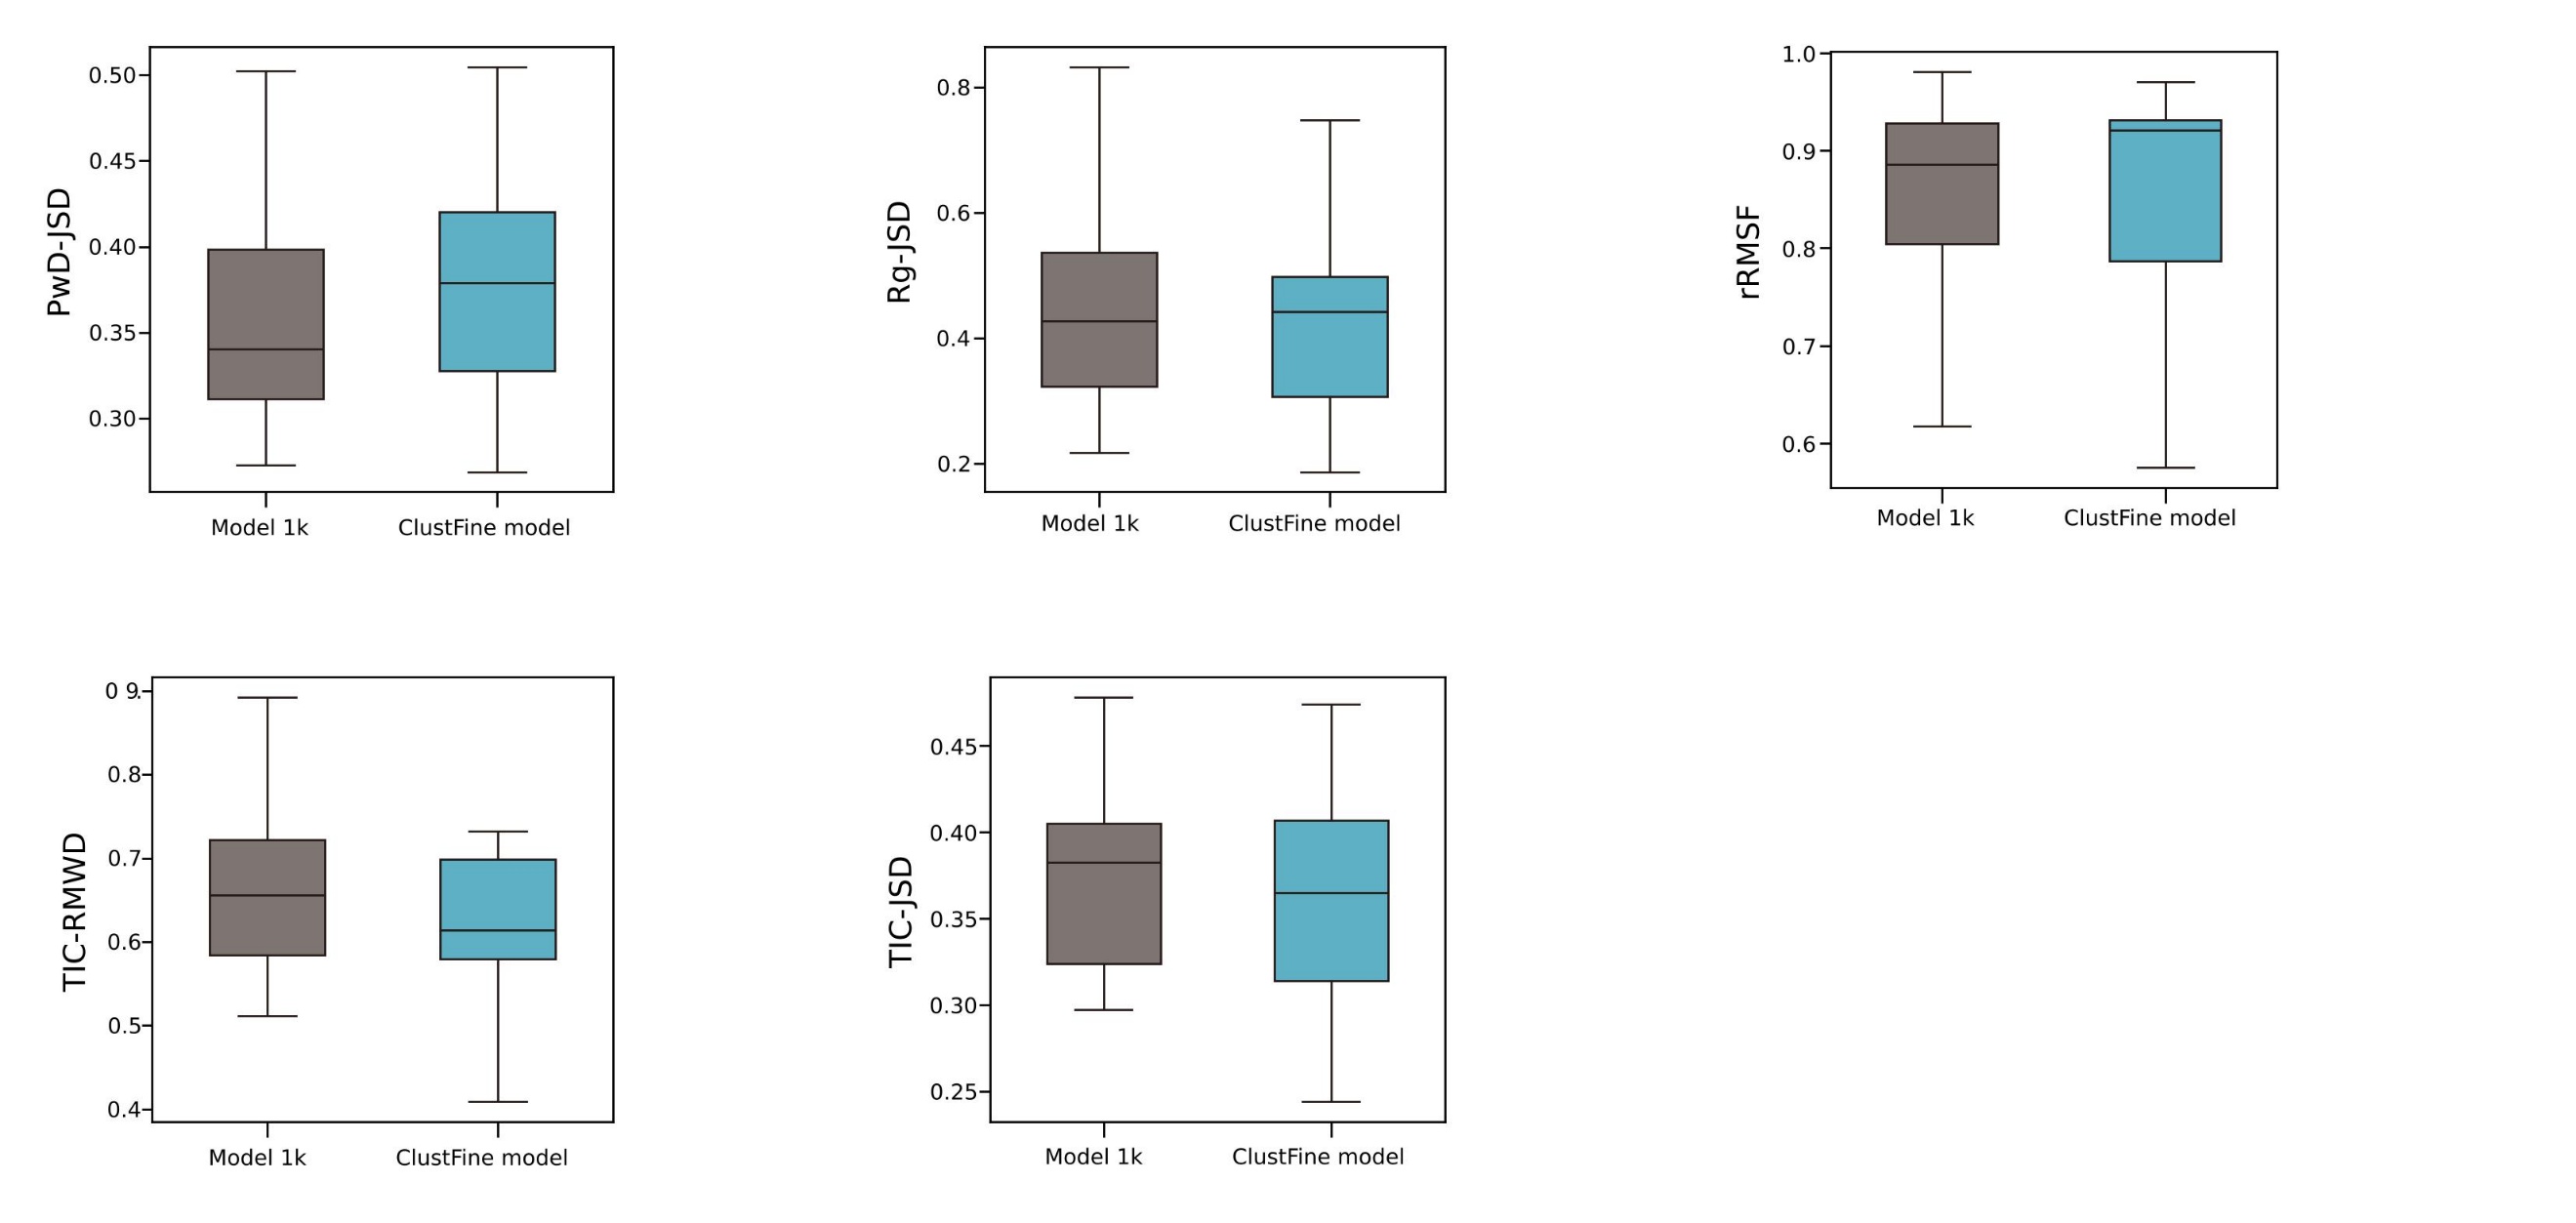


**Supplementary Figure 14.** Comparative analysis of ensemble accuracy and the ClustFine training strategy. Boxplots of TIC-JSD, PwD-JSD, Rg-JSD, TIC-RMWD, and rRMSF, comparing generated samples against reference MD trajectories for the 1k and the ClustFine models. To finetune the ClustFine model, we employ an RMSD-based clustering strategy. Specifically, MD trajectories are clustered into discrete bins at 0.1Å intervals based on their RMSD relative to the reference structure. During each training epoch, a batch of *n* clusters is randomly selected (*n* = batch size), and a single frame is sampled from each bin to supervise the training process. All other training hyperparameters remained identical to those used for the model 1k.
